# Supplementary material for: Novel stereocontrolled amidoglycosylation of alcohols with acetylated glycals and sulfamate ester
Source: Royal Society of Chemistry journal article supplement (doi:10.1039/c4ra02367f), 2014-01-01

## Supplementary Information

### Novel Stereocontrolled Amidoglycosylation of Alcohols with Acetylated Glycals and Sulfamate Ester

Teiichi Murakami,\* Yukari Sato, Kyoko Yoshioka and Mutsuo Tanaka

Biomedical Research Institute

National Institute of Advanced Industrial Science and Technology (AIST)

Tsukuba Central 6, Tsukuba, Ibaraki 305-8566, Japan

## Experimental

### General

Melting points were determined with a Yanaco melting point apparatus MP-500D. Optical rotations were measured with a JASCO DIP-1000 polarimeter and  $[\alpha]_D$  values are given in  $10^{-1}$  deg  $\text{cm}^2 \text{g}^{-1}$ .  $^1\text{H}$  and  $^{13}\text{C}$  NMR spectra were recorded on a Varian INOVA 400 (400 MHz for  $^1\text{H}$  and 100 MHz for  $^{13}\text{C}$ ) spectrometer or on a Bruker Avance III-500 (500 MHz for  $^1\text{H}$  and 125.8 MHz for  $^{13}\text{C}$ ) spectrometer.  $^1\text{H}$  chemical shifts ( $\delta$ ) are given in ppm relative to internal  $(\text{CH}_3)_4\text{Si}$  ( $\delta$  0.00) in  $\text{CDCl}_3$  and  $^{13}\text{C}$  chemical shifts ( $\delta$ ) are given in ppm relative to  $\text{CDCl}_3$  ( $\delta$  77.0). Elemental analyses were performed in the analytical section in this Institute (AIST). Mass spectra (MS) were recorded on a Waters micromass ZQ spectrometer with electrospray ionisation (ESI) in the positive ion mode. Thin layer chromatography (TLC) and column chromatography were performed on Merck pre-coated silica gel 60F<sub>254</sub> plates and silica gel (Kanto Chemicals, neutral, 100-210  $\mu\text{m}$ , or Wakogel C-300, 45-75  $\mu\text{m}$ ), respectively.  $\text{Rh}_2(\text{NHCOCF}_3)_4$  was prepared from  $\text{Rh}_2(\text{OAc})_4$  and  $\text{CF}_3\text{CONH}_2$  in chlorobenzene according to the following: K. Guthikonda and J. Du Bois, *J. Am. Chem. Soc.*, 2002, **124**, 13672; Supporting information, p. 2.

### General procedure for amidoacetoxylation

To a mixture of glycal (0.2 mmol),  $\text{Cl}_3\text{CCH}_2\text{OSO}_2\text{NH}_2$  (80 mg, 0.35 mmol),  $\text{Rh}_2(\text{NHCOCF}_3)_4$  (12 mg, 0.02 mmol), and  $\text{MgO}$  (32 mg, 0.8 mmol) under nitrogen was added  $\text{PhCl}$  (3 mL), and the

---

\* Corresponding author. fax: +81-29-861-6122; e-mail: t-murakami@aist.go.jp

resulting light-purple suspension was cooled with an ice-water bath.  $\text{PhI}(\text{OAc})_2$  (80 mg, 0.36 mmol) was added in several portions for 1 h, and the resulting light-brown suspension was stirred at 5 °C for 1 h and then at rt for 10 h. The reaction mixture was filtered, washed with  $\text{CH}_2\text{Cl}_2$ , and the combined filtrates were concentrated under reduced pressure. The residue was purified by silica gel chromatography eluting with hexane-EtOAc mixture.

**1,3,4,6-tetra-*O*-Acetyl-2-deoxy-2-(2,2,2-trichloroethoxysulfonyl)amido- $\beta$ -D-glucopyranose**

**(2a- $\beta$ )**

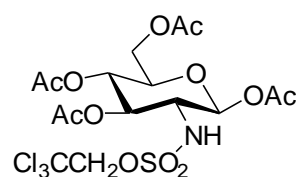

$R_f$  0.33 (3:2 hexane/EtOAc);  $[\alpha]_D^{25} +8.3$  (c 0.6,  $\text{CHCl}_3$ );  $^1\text{H NMR}$  ( $\text{CDCl}_3$ ):  $\delta$  2.05 (s, 3H), 2.11 (s, 3H), 2.17 (s, 3H), 2.23 (s, 3H), 3.95 (dt, 1H,  $J = 8.9, 11.1$  Hz), 4.06 (dt, 1H,  $J = 0.9, 6.5$  Hz), 4.12 (dd, 1H,  $J = 6.3, 11.2$  Hz), 4.16 (dd, 1H,  $J = 6.7, 11.2$  Hz), 4.64 (s, 2H), 5.08 (dd, 1H,  $J = 3.3, 11.1$  Hz), 5.40 (d, 1H,  $J = 3.3$  Hz), 5.67 (d, 1H,  $J = 9.0$  Hz), 5.72 (d, 1H,  $J = 8.8$  Hz).

**1,3,4,6-tetra-*O*-Acetyl-2-deoxy-2-(2,2,2-trichloroethoxysulfonyl)amido- $\alpha$ -D-galactopyranose**

**(2b- $\alpha$ )**

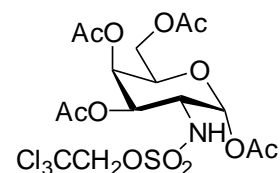

$R_f$  0.24 (3:2 hexane/EtOAc);  $[\alpha]_D^{25} +105.4$  (c 1.92,  $\text{CHCl}_3$ );  $^1\text{H NMR}$  ( $\text{CDCl}_3$ ):  $\delta$  2.03 (s, 3H), 2.10 (s, 3H), 2.17 (s, 3H), 2.21 (s, 3H), 4.07 (dd, 1H,  $J = 6.7, 11.2$  Hz), 4.10 (dd, 1H,  $J = 6.7, 11.2$  Hz), 4.15 (ddd, 1H,  $J = 3.6, 9.6, 11.2$  Hz), 4.25 (dt, 1H,  $J = 0.9, 6.7$  Hz), 4.61 (d, 1H,  $J = 10.8$  Hz), 4.66 (d, 1H,  $J = 10.8$  Hz), 5.14 (d, 1H,  $J = 9.6$  Hz), 5.24 (dd, 1H,  $J = 3.2, 11.3$  Hz), 5.45 (dd, 1H,  $J = 1.0, 3.1$  Hz), 6.40 (d, 1H,  $J = 3.6$  Hz);  $^{13}\text{C NMR}$  ( $\text{CDCl}_3$ ):  $\delta$  20.57, 20.60, 20.78, 20.84, 52.0, 61.1, 66.9, 67.4, 68.5, 78.3, 90.9, 93.1, 169.0, 170.0, 170.4, 171.0; MS (ESI)  $m/z$  calcd for  $\text{C}_{16}\text{H}_{22}^{35}\text{Cl}_3\text{NO}_{12}\text{S}$  556.99; found (%) 579.85 ( $[\text{M}(^{35}\text{Cl}_3)+\text{Na}]^+$ , 94), 581.96 ( $[\text{M}(^{35}\text{Cl}_2+^{37}\text{Cl})+\text{Na}]^+$ , 100), 583.95 ( $[\text{M}(^{35}\text{Cl}+^{37}\text{Cl}_2)+\text{Na}]^+$ , 39).

**1,3,4,6-tetra-*O*-Acetyl-2-deoxy-2-(2,2,2-trichloroethoxysulfonyl)amido- $\beta$ -D-galactopyranose (2b- $\beta$ )**

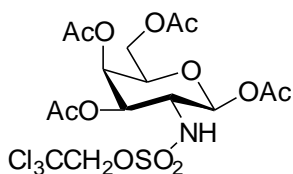

$R_f$  0.33 (3:2 hexane/EtOAc);  $[\alpha]_D^{25} +8.3$  (c 0.6,  $\text{CHCl}_3$ );  $^1\text{H NMR}$  ( $\text{CDCl}_3$ ):  $\delta$  2.05 (s, 3H), 2.11 (s, 3H), 2.17 (s, 3H), 2.23 (s, 3H), 3.95 (dt, 1H,  $J = 8.9, 11.1$  Hz), 4.06 (dt, 1H,  $J = 0.9, 6.5$  Hz), 4.12 (dd, 1H,  $J = 6.3, 11.2$  Hz), 4.16 (dd, 1H,  $J = 6.7, 11.2$  Hz), 4.64 (s, 2H), 5.08 (dd, 1H,  $J = 3.3, 11.1$  Hz), 5.40 (d, 1H,  $J = 3.3$  Hz), 5.67 (d, 1H,  $J = 9.0$  Hz), 5.72 (d, 1H,  $J = 8.8$  Hz).

**1,3,6-tri-*O*-Acetyl-4-*O*-(2,3,4,6-tetra-*O*-acetyl- $\beta$ -D-galactopyranosyl)-2-deoxy-2-(2,2,2-trichloroethoxysulfonyl)amido- $\beta$ -D-glucopyranose (2c- $\beta$ )**

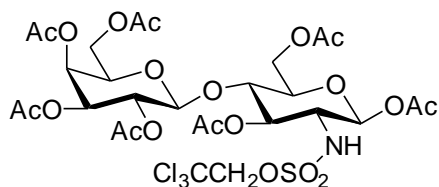

$R_f$  0.27 (1:1 hexane/EtOAc);  $^1\text{H NMR}$  ( $\text{CDCl}_3$ ):  $\delta$  1.98 (s, 3H), 2.07 (s, 3H), 2.08 (s, 3H), 2.13 (s, 3H), 2.17 (s, 6H), 2.18 (s, 3H), 2.23 (s, 3H), 3.73 (q, 1H,  $J = 8.7$  Hz), 3.86 (m, 2H), 3.91 (t, 1H,  $J = 7.2$  Hz), 4.10 (dd, 1H,  $J = 7.1, 11.2$  Hz), 4.14 (m, 1H), 4.18 (dd, 1H,  $J = 6.3, 11.0$  Hz), 4.45 (dd, 1H,  $J = 1.9, 12$  Hz), 4.49 (d, 1H,  $J = 7.8$  Hz), 4.65 (s, 2H), 5.00 (dd, 1H,  $J = 2.5, 10.5$  Hz), 5.10 (dd, 1H,  $J = 7.8, 10.5$  Hz), 5.17 (t, 1H), 5.38 (dd, 1H,  $J = 0.8, 3.3$  Hz), 5.74 (d, 1H,  $J = 7.8$  Hz), 6.02 (d, 1H,  $J = 9.4$  Hz);  $^{13}\text{C NMR}$  ( $\text{CDCl}_3$ ):  $\delta$  20.49, 20.63 (3C), 20.81, 20.91, 21.01, 57.2, 60.9, 61.9, 66.6, 69.0, 70.7, 70.9, 71.7, 73.5, 74.5, 78.6, 91.9, 93.3, 100.7, 169.2, 169.6, 170.07, 170.13, 170.32, 170.38, 170.9; MS (ESI)  $m/z$  calcd for  $\text{C}_{28}\text{H}_{38}^{35}\text{Cl}_3\text{NO}_{20}\text{S}$  845.08; found (%) 868.08 ( $[\text{M}(^{35}\text{Cl}_3)+\text{Na}]^+$ , 91), 870.07 ( $[\text{M}(^{35}\text{Cl}_2+^{37}\text{Cl})+\text{Na}]^+$ , 100), 872.00 ( $[\text{M}(^{35}\text{Cl}+^{37}\text{Cl}_2)+\text{Na}]^+$ , 38).

**General procedure for amidoglycosylation**

To a mixture of glycal (0.2 mmol), alcohol (0.4 mmol),  $\text{Cl}_3\text{CCH}_2\text{OSO}_2\text{NH}_2$  (80 mg, 0.35 mmol),  $\text{Rh}_2(\text{NHCOCF}_3)_4$  (12 mg, 0.02 mmol), and activated powdered molecular sieves 4Å (160 mg) under nitrogen was added PhCl (3 mL), and the resulting light-purple suspension was cooled with an ice-water bath. PhIO (80 mg, 0.36 mmol) was added in several portions for 1 h, and the resulting light-brown suspension was stirred at 5 °C for 1 h and then at rt for 5-15 h with monitoring the

reaction by TLC. The reaction mixture was filtered, washed with CH<sub>2</sub>Cl<sub>2</sub>, and the combined filtrates were concentrated under reduced pressure to remove CH<sub>2</sub>Cl<sub>2</sub>. The residue was purified by silica gel chromatography, usually eluting with hexane-EtOAc mixture.

## Tetradecyl

### 3,4,6-tri-*O*-acetyl-2-deoxy-2-(2,2,2-trichloroethoxysulfonyl)amido-β-D-glucopyranoside (3a)

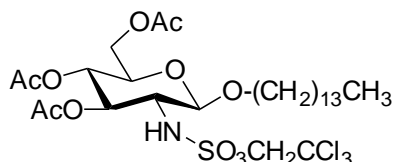

$R_f$  0.35 (2:1 hexane/EtOAc);  $[\alpha]_D^{25}$  -18.0 (c 2.2, CHCl<sub>3</sub>); <sup>1</sup>H NMR (CDCl<sub>3</sub>): δ 0.88 (t, 3H,  $J$  = 6.9 Hz), 1.25 (s-like, 20H), 1.32 (m, 2H), 1.66 (quint, 2H,  $J$  = 7.3 Hz), 2.04 (s, 3H), 2.10 (s, 3H), 2.13 (s, 3H), 3.56 (dt, 1H,  $J$  = 9.3, 7.1 Hz), 3.58 (q, 1H,  $J$  = 9.0 Hz), 3.69 (ddd, 1H,  $J$  = 2.3, 4.9, 8.8 Hz), 3.88 (dt, 1H,  $J$  = 9.4, 7.3 Hz), 4.14 (dd, 1H,  $J$  = 2.3, 12.3 Hz), 4.27 (dd, 1H,  $J$  = 4.9, 12.3 Hz), 4.43 (d, 1H,  $J$  = 8.2 Hz), 4.68 (d, 1H,  $J$  = 10.9 Hz), 4.72 (d, 1H,  $J$  = 10.9 Hz), 5.08 (t, 1H,  $J$  = 9.5 Hz), 5.12 (t, 1H,  $J$  = 9.5 Hz), 5.36 (d, 1H,  $J$  = 8.9 Hz); <sup>13</sup>C NMR (CDCl<sub>3</sub>): δ 14.1, 20.6, 20.7, 20.8, 22.7, 25.8, 29.34, 29.36, 29.49, 29.58, 29.64, 31.9, 59.0, 62.0, 68.4, 70.6, 71.8, 72.8, 78.7, 93.4, 100.8, 169.3, 170.7, 171.6; MS (ESI)  $m/z$  calcd for C<sub>28</sub>H<sub>48</sub><sup>35</sup>Cl<sub>3</sub>NO<sub>11</sub>S 711.20; found (%) 734.21 ([M(<sup>35</sup>Cl<sub>3</sub>)+Na]<sup>+</sup>, 97), 736.21 ([M(<sup>35</sup>Cl<sub>2</sub>+<sup>37</sup>Cl)+Na]<sup>+</sup>, 100), 738.16 ([M(<sup>35</sup>Cl+<sup>37</sup>Cl<sub>2</sub>)+Na]<sup>+</sup>, 43).

## 12-Bromododecyl

### 3,4,6-tri-*O*-acetyl-2-deoxy-2-(2,2,2-trichloroethoxysulfonyl)amido-β-D-glucopyranoside (4a)

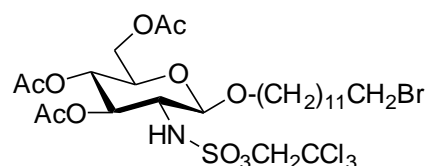

mp 71-73 °C;  $R_f$  0.33 (2:1 hexane/EtOAc);  $[\alpha]_D^{25}$  -17.8 (c 2.50, CHCl<sub>3</sub>); <sup>1</sup>H NMR (CDCl<sub>3</sub>): δ 1.26 (s-like, 14H), 1.42 (m, 2H), 1.66 (m, 2H), 1.85 (quint, 2H,  $J$  = 7.3 Hz), 2.05 (s, 3H), 2.10 (s, 3H), 2.13 (s, 3H), 3.41 (t, 2H,  $J$  = 6.9 Hz), 3.57 (dt, 1H,  $J$  = 9.4, 7.0 Hz), 3.58 (q, 1H,  $J$  = 9.0 Hz), 3.71 (ddd, 1H,  $J$  = 2.3, 4.8, 9.4 Hz), 3.88 (dt, 1H,  $J$  = 9.4, 7.3 Hz), 4.14 (dd, 1H,  $J$  = 2.3, 12.3 Hz), 4.28 (dd, 1H,  $J$  = 4.8, 12.3 Hz), 4.44 (d, 1H,  $J$  = 8.2 Hz), 4.68 (d, 1H,  $J$  = 10.9 Hz), 4.72 (d, 1H,  $J$  = 10.9 Hz), 5.08 (t, 1H,  $J$  = 9.5 Hz), 5.13 (t, 1H,  $J$  = 9.5 Hz), 5.52 (d, 1H,  $J$  = 9.0 Hz); <sup>13</sup>C NMR (CDCl<sub>3</sub>): δ 20.58, 20.73, 20.85, 25.8, 28.1, 28.7, 29.34, 29.39, 29.47, 29.49, 32.8, 34.1, 59.0, 62.0, 68.4, 70.6, 71.8, 72.9, 78.6, 93.4, 100.7, 169.3, 170.7, 171.6; Anal. Calcd for C<sub>26</sub>H<sub>43</sub>BrCl<sub>3</sub>NO<sub>11</sub>S: C, 40.88; H,

5.67; N, 1.83; S, 4.20. Found: C, 41.16; H, 5.63; N, 1.84; S, 4.39.

## 12-Bromododecyl

### 3,4,6-tri-*O*-acetyl-2-deoxy-2-(2,2,2-trichloroethoxysulfonyl)amido- $\beta$ -D-galactopyranoside (4b)

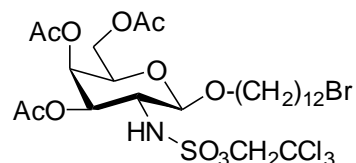

$R_f$  0.33 (2:1 hexane/EtOAc);  $[\alpha]_D^{25}$  -35.5 (c 1.92, CHCl<sub>3</sub>); <sup>1</sup>H NMR (CDCl<sub>3</sub>):  $\delta$  1.27 (s-like, 14H), 1.42 (m, 2H), 1.68 (m, 2H), 1.85 (quint, 2H,  $J = 7.2$  Hz), 2.06 (s, 3H), 2.10 (s, 3H), 2.18 (s, 3H), 3.41 (t, 2H,  $J = 6.9$  Hz), 3.58 (dt, 1H,  $J = 9.3, 7.2$  Hz), 3.73 (q, 1H,  $J = 9.0$  Hz), 3.90 (dt, 1H,  $J = 9.4, 7.3$  Hz), 3.93 (t, 1H,  $J = 6.6$  Hz), 4.12 (dd, 1H,  $J = 6.7, 11.2$  Hz), 4.20 (dd, 1H,  $J = 6.5, 11.2$  Hz), 4.46 (d, 1H,  $J = 8.4$  Hz), 4.71 (s, 2H), 5.07 (dd, 1H,  $J = 3.5, 10.9$  Hz), 5.37 (d, 1H,  $J = 3.5$  Hz), 5.44 (br, 1H); <sup>13</sup>C NMR (CDCl<sub>3</sub>):  $\delta$  20.68 (2C), 20.82, 25.8, 28.1, 28.7, 29.39, 29.47, 29.50, 32.8, 34.0, 56.1, 61.3, 66.9, 70.66, 70.71, 78.6, 93.4, 101.0, 170.2, 170.5, 171.2.

## Bromododecyl

### 3,6-di-*O*-acetyl-4-*O*-(2,3,4,6-tetra-*O*-acetyl- $\beta$ -D-galactopyranosyl)-

### 2-deoxy-2-(2,2,2-trichloroethoxysulfonyl)amido- $\beta$ -D-glucopyranoside (4c)

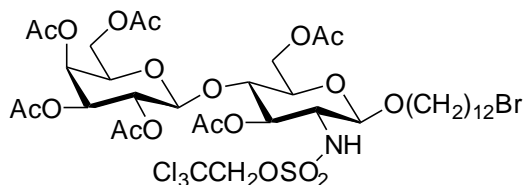

$R_f$  0.24 (3:2 hexane/EtOAc);  $[\alpha]_D^{25}$  -13.0 (c 2.1, CHCl<sub>3</sub>); <sup>1</sup>H NMR (CDCl<sub>3</sub>):  $\delta$  1.24-1.35 (m, 14H), 1.42 (m, 2H), 1.64 (m, 2H), 1.85 (quint, 2H,  $J = 7.2$  Hz), 1.98 (s, 3H), 2.06 (s, 3H), 2.07 (s, 3H), 2.13 (s, 3H), 2.157 (s, 3H), 2.164 (s, 3H), 3.41 (t, 2H,  $J = 6.9$  Hz), 3.52 (dt, 1H,  $J = 9.5, 6.9$  Hz), 3.55 (dt, 1H,  $J = 7.5, 9.0$  Hz), 3.67 (ddd, 1H,  $J = 2.5, 5.2, 8.4$  Hz), 3.80 (t, 1H,  $J = 8.5$  Hz), 3.83 (dt, 1H,  $J = 9.5, 7.2$  Hz), 3.91 (t, 1H,  $J = 6.7$  Hz), 4.10 (dd, 1H,  $J = 7.1, 11.1$  Hz), 4.14 (dd, 1H,  $J = 5.2, 12.2$  Hz), 4.17 (dd, 1H,  $J = 6.5, 11.1$  Hz), 4.44 (d, 1H,  $J = 7.6$  Hz), 4.49 (dd, 1H,  $J = 2.5, 12.0$  Hz), 4.50 (d, 1H,  $J = 7.8$  Hz), 4.69 (d, 1H,  $J = 10.9$  Hz), 4.72 (d, 1H,  $J = 10.9$  Hz), 4.99 (dd, 1H,  $J = 3.4, 10.5$  Hz), 5.08 (dd, 1H,  $J = 8.4, 9.4$  Hz), 5.10 (dd, 1H,  $J = 7.8, 10.5$  Hz), 5.37 (dd, 1H,  $J = 0.9, 3.4$  Hz), 5.71 (d, 1H,  $J = 9.0$  Hz); <sup>13</sup>C NMR (CDCl<sub>3</sub>):  $\delta$  20.51, 20.65 (3C), 20.85, 20.97, 25.8, 28.1, 28.7, 29.35, 29.39, 29.47, 32.8, 34.1, 58.3, 60.9, 62.2, 66.6, 69.1, 70.4, 70.7, 70.8, 72.4, 72.6, 75.6, 78.6, 93.4, 100.5, 100.9, 169.5, 170.06, 170.12, 170.36, 170.42, 171.2; MS (ESI)  $m/z$  calcd for

$C_{38}H_{59}^{79}Br^{35}Cl_3NO_{19}S$  1049.17; found (%) 1072.16 ( $[M(^{79}Br+^{35}Cl_3)+Na]^+$ , 54), 1074.21 ( $[M(^{35}Cl_2+^{37}Cl)+Na]^+$ , 100), 1076.13 ( $[M(^{35}Cl+^{37}Cl_2)+Na]^+$ , 78).

## 2-Phenylethyl

### 3,4,6-tri-*O*-acetyl-2-deoxy-2-(2,2,2-trichloroethoxysulfonyl)amido- $\beta$ -D-glucopyranoside (6a)

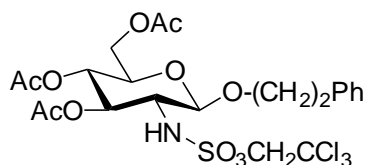

$R_f$  0.34 (3:2 hexane/EtOAc);  $[\alpha]_D^{25}$  -14.4 (c 0.90,  $CHCl_3$ );  $^1H$  NMR ( $CDCl_3$ ):  $\delta$  2.04 (s, 3H), 2.09 (s, 3H), 2.12 (s, 3H), 2.99 (t, 2H,  $J = 7.6$  Hz), 3.60 (q, 1H,  $J = 9.0$  Hz), 3.69 (ddd, 1H,  $J = 2.5, 4.9, 9.6$  Hz), 3.80 (dt, 1H,  $J = 10.2, 7.7$  Hz), 4.11 (dt, 1H,  $J = 10.1, 7.6$  Hz), 4.13 (dd, 1H,  $J = 2.5, 12.3$  Hz), 4.26 (dd, 1H,  $J = 4.9, 12.3$  Hz), 4.46 (d, 1H,  $J = 8.2$  Hz), 4.64 (d, 1H,  $J = 10.9$  Hz), 4.68 (d, 1H,  $J = 10.9$  Hz), 5.07 (t, 1H,  $J = 9.4$  Hz), 5.12 (t, 1H,  $J = 9.6$  Hz), 5.52 (d, 1H,  $J = 9.0$  Hz);  $^{13}C$  NMR ( $CDCl_3$ ):  $\delta$  20.6, 20.7, 20.9, 36.0, 58.9, 61.9, 68.4, 70.9, 71.9, 72.8, 78.6, 93.4, 100.7, 126.7, 128.6 (2C), 128.9 (2C), 137.6, 169.4, 170.7, 171.6.

## Benzyl

### 3,4,6-tri-*O*-acetyl-2-deoxy-2-(2,2,2-trichloroethoxysulfonyl)amido- $\beta$ -D-galactopyranoside (7b)

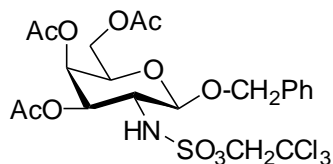

$R_f$  0.28 (3:2 hexane/EtOAc);  $[\alpha]_D^{25}$  -44.4 (c 1.45,  $CHCl_3$ );  $^1H$  NMR ( $CDCl_3$ ):  $\delta$  2.05 (s, 3H), 2.08 (s, 3H), 2.18 (s, 3H), 3.80 (dt, 1H,  $J = 10.9, 8.6$  Hz), 3.90 (dt, 1H,  $J = 0.9, 6.6$  Hz), 4.15 (dd, 1H,  $J = 6.5, 11.3$  Hz), 4.22 (dd, 1H,  $J = 6.7, 11.3$  Hz), 4.49 (d, 1H,  $J = 8.3$  Hz), 4.56 (s, 2H), 4.68 (d, 1H,  $J = 11.6$  Hz), 4.94 (d, 1H,  $J = 11.0$  Hz), 5.01 (dd, 1H,  $J = 3.4, 10.9$  Hz), 5.21 (d, 1H,  $J = 8.7$  Hz), 5.36 (d, 1H,  $J = 3.4$  Hz), 7.30-7.40 (m, 5H);  $^{13}C$  NMR ( $CDCl_3$ ):  $\delta$  20.7 (2C), 20.8, 56.0, 61.4, 66.9, 70.7, 70.9, 71.0, 78.6, 93.3, 99.2, 128.5, 128.6, 128.7, 135.8, 170.2, 170.5, 171.2; MS (ESI)  $m/z$  calcd for  $C_{21}H_{26}^{35}Cl_3NO_{11}S$  605.03; found (%) 627.96 ( $[M(^{35}Cl_3)+Na]^+$ , 92), 629.94 ( $[M(^{35}Cl_2+^{37}Cl)+Na]^+$ , 100), 631.93 ( $[M(^{35}Cl+^{37}Cl_2)+Na]^+$ , 41).

## 4-Pentenyl

### 3,4,6-tri-*O*-acetyl-2-deoxy-2-(2,2,2-trichloroethoxysulfonyl)amido- $\beta$ -D-galactopyranoside (8b)

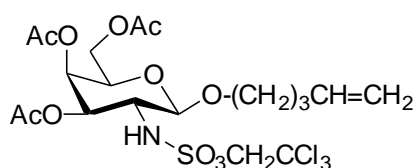

mp 84-86 °C;  $R_f$  0.36 (3:2 hexane/EtOAc);  $[\alpha]_D^{25}$  -23.1 (c 1.45, CHCl<sub>3</sub>); <sup>1</sup>H NMR (CDCl<sub>3</sub>):  $\delta$  1.79 (quint, 2H,  $J = 7.2$  Hz), 2.06 (s, 3H), 2.10 (s, 3H), 2.15 (m, 2H), 2.18 (s, 3H), 3.61 (dt, 2H,  $J = 9.6, 7.0$  Hz), 3.74 (dt, 1H,  $J = 11.1, 8.4$  Hz), 3.91 (t, 1H,  $J = 7.0$  Hz), 3.92 (dt, 1H,  $J = 9.5, 7.0$  Hz), 4.12 (dd, 1H,  $J = 6.7, 11.3$  Hz), 4.19 (dd, 1H,  $J = 6.7, 11.3$  Hz), 4.46 (d, 1H,  $J = 8.2$  Hz), 4.68 (d, 1H,  $J = 11.0$  Hz), 4.71 (d, 1H,  $J = 11.0$  Hz), 4.99 (m, 1H), 5.04 (m, 1H), 5.05 (dd, 1H,  $J = 3.4, 11.0$  Hz), 5.20 (d, 1H,  $J = 8.4$  Hz), 5.37 (d, 1H,  $J = 3.3$  Hz), 5.80 (ddt, 1H,  $J = 17.0, 10.2, 6.7$  Hz); <sup>13</sup>C NMR (CDCl<sub>3</sub>):  $\delta$  20.7 (2C), 20.8, 28.6, 29.9, 56.1, 61.4, 66.9, 69.9, 70.7, 78.6, 93.4, 101.0, 115.2, 137.6, 170.2, 170.5, 171.3; Anal. Calcd for C<sub>19</sub>H<sub>28</sub>Cl<sub>3</sub>NO<sub>11</sub>S: C, 39.02; H, 4.83; N, 2.39; S, 5.48. Found: C, 38.83; H, 4.86; N, 2.34; S, 5.39.

## Cyclohexyl

### 3,4,6-tri-*O*-acetyl-2-deoxy-2-(2,2,2-trichloroethoxysulfonyl)amido- $\beta$ -D-glucopyranoside (9a)

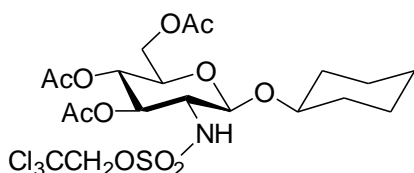

$R_f$  0.35 (3:2 hexane/EtOAc);  $[\alpha]_D^{25}$  -21.8 (c 2.0, CHCl<sub>3</sub>); <sup>1</sup>H NMR (CDCl<sub>3</sub>):  $\delta$  1.10-1.50 (m, 5H), 1.57 (m, 1H), 1.78 (m, 2H), 1.98 (m, 2H), 2.05 (s, 3H), 2.09 (s, 3H), 2.13 (s, 3H), 3.57 (q, 1H,  $J = 9.1$  Hz), 3.70 (m, 2H), 4.12 (dd, 1H,  $J = 2.5, 12.3$  Hz), 4.28 (dd, 1H,  $J = 5.1, 12.3$  Hz), 4.58 (d, 1H,  $J = 8.2$  Hz), 4.72 (s, 2H), 5.07 (t, 1H,  $J = 9.5$  Hz), 5.14 (t, 1H,  $J = 9.7$  Hz), 5.55 (d, 1H,  $J = 9.0$  Hz); <sup>13</sup>C NMR (CDCl<sub>3</sub>):  $\delta$  20.58, 20.73, 20.88, 24.2, 24.3, 25.4, 31.7, 33.5, 59.0, 62.1, 68.6, 71.7, 73.0, 78.4, 78.7, 93.4, 98.7, 169.4, 170.8, 171.7; MS (ESI)  $m/z$  calcd for C<sub>20</sub>H<sub>30</sub><sup>35</sup>Cl<sub>3</sub>NO<sub>11</sub>S 597.06; found (%) 619.95 ([M(<sup>35</sup>Cl<sub>3</sub>)+Na]<sup>+</sup>, 100), 622.00 ([M(<sup>35</sup>Cl<sub>2</sub>+<sup>37</sup>Cl)+Na]<sup>+</sup>, 97), 623.92 ([M(<sup>35</sup>Cl+<sup>37</sup>Cl<sub>2</sub>)+Na]<sup>+</sup>, 39).

## Cyclohexyl

### 3,4,6-tri-*O*-acetyl-2-deoxy-2-(2,2,2-trichloroethoxysulfonyl)amido- $\beta$ -D-galactopyranoside (9b)

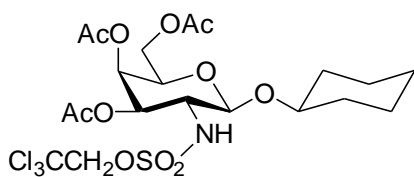

$R_f$  0.31 (2:1 hexane/EtOAc);  $[\alpha]_D^{25}$  -30.2 (c 1.1, CHCl<sub>3</sub>); <sup>1</sup>H NMR (CDCl<sub>3</sub>):  $\delta$  1.10-1.50 (m, 5H), 1.57 (m, 1H), 1.79 (m, 2H), 2.01 (m, 2H) 2.06 (s, 3H), 2.10 (s, 3H), 2.18 (s, 3H), 3.69 (dt, 1H,  $J$  = 3.3, 10.0 Hz), 3.72 (dt, 1H,  $J$  = 10.9, 8.6 Hz), 3.93 (t, 1H,  $J$  = 6.7 Hz), 4.10 (dd, 1H,  $J$  = 6.7, 11.2 Hz), 4.21 (dd, 1H,  $J$  = 6.6, 11.3 Hz), 4.60 (d, 1H,  $J$  = 8.3 Hz), 4.73 (s, 2H), 5.07 (dd, 1H,  $J$  = 3.5, 10.7 Hz), 5.36 (d, 1H,  $J$  = 3.5 Hz), 5.53 (d, 1H,  $J$  = 9.0 Hz); <sup>13</sup>C NMR (CDCl<sub>3</sub>):  $\delta$  20.65, 20.71, 20.85, 24.2, 24.4, 25.4, 31.7, 33.6, 56.2, 61.3, 66.9, 70.6, 70.9.1, 78.5, 78.6, 93.4, 99.1, 170.3, 170.5, 171.3; MS (ESI)  $m/z$  calcd for C<sub>20</sub>H<sub>30</sub><sup>35</sup>Cl<sub>3</sub>NO<sub>11</sub>S 597.06; found (%) 620.02 ([M(<sup>35</sup>Cl<sub>3</sub>)+Na]<sup>+</sup>, 94), 622.00 ([M(<sup>35</sup>Cl<sub>2</sub>+<sup>37</sup>Cl)+Na]<sup>+</sup>, 100), 623.99 ([M(<sup>35</sup>Cl+<sup>37</sup>Cl<sub>2</sub>)+Na]<sup>+</sup>, 39).

## L-Menthyl

### 3,4,6-tri-*O*-acetyl-2-deoxy-2-(2,2,2-trichloroethoxysulfonyl)amido- $\beta$ -D-glucopyranoside (10a)

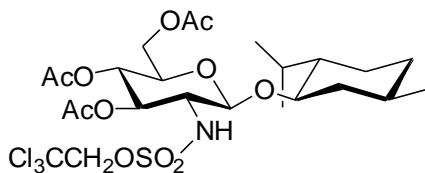

$R_f$  0.40 (2:1 hexane/EtOAc);  $[\alpha]_D^{25}$  -53.4 (c 0.90, CHCl<sub>3</sub>); <sup>1</sup>H NMR (CDCl<sub>3</sub>):  $\delta$  0.74 (d, 3H,  $J$  = 6.8 Hz), 0.82 (m, 1H), 0.87 (d, 3H,  $J$  = 7.0 Hz), 0.93 (d, 3H,  $J$  = 6.5 Hz), 0.98 (m, 1H), 1.00 (q, 1H,  $J$  = 11.7 Hz), 1.30 (m, 2H), 1.67 (m, 2H), 2.02 (m, 1H), 2.05 (s, 3H), 2.07 (s, 3H), 2.14 (s, 3H), 2.22 (m, 1H), 3.55 (q, 1H,  $J$  = 9.1 Hz), 3.56 (dt, 1H,  $J$  = 3.3, 11.0 Hz), 3.70 (ddd, 1H,  $J$  = 2.7, 5.3, 9.5 Hz), 4.14 (dd, 1H,  $J$  = 2.7, 12.1 Hz), 4.20 (dd, 1H,  $J$  = 5.3, 12.1 Hz), 4.54 (d, 1H,  $J$  = 8.3 Hz), 4.75 (2H), 5.07 (t, 1H,  $J$  = 9.5 Hz), 5.13 (t, 1H,  $J$  = 9.5 Hz), 5.38 (d, 1H,  $J$  = 9.0 Hz); <sup>13</sup>C NMR (CDCl<sub>3</sub>):  $\delta$  15.3, 20.58, 20.66, 20.80, 20.88, 22.2, 23.1, 25.1, 31.5, 34.2, 40.0, 47.6, 58.9, 62.4, 68.7, 71.5, 73.2, 77.6, 78.8, 93.4, 97.3, 169.4, 170.7, 171.7.

## L-Menthyl

### 3,4,6-tri-*O*-acetyl-2-deoxy-2-(2,2,2-trichloroethoxysulfonyl)amido- $\beta$ -D-galactopyranoside (10b)



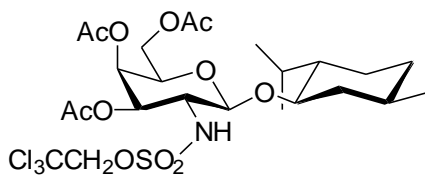

$R_f$  0.40 (2:1 hexane/EtOAc);  $[\alpha]_D^{25}$  -54.3 (c 0.84,  $\text{CHCl}_3$ );  $^1\text{H NMR}$  ( $\text{CDCl}_3$ ):  $\delta$  0.74 (d, 3H,  $J = 6.8$  Hz), 0.82 (m, 1H), 0.88 (d, 3H,  $J = 7.0$  Hz), 0.93 (d, 3H,  $J = 6.5$  Hz), 0.98 (m, 1H), 1.00 (q, 1H,  $J = 11.7$  Hz), 1.30 (m, 2H), 1.67 (m, 2H), 2.04 (s, 3H), 2.07 (m, 1H), 2.11 (s, 3H), 2.20 (s, 3H), 2.27 (m, 1H), 3.53 (dt, 1H,  $J = 4.1, 10.7$  Hz), 3.66 (q, 1H,  $J = 9.4$  Hz), 3.92 (t, 1H,  $J = 6.7$  Hz), 4.08 (dd, 1H,  $J = 6.6, 11.2$  Hz), 4.20 (dd, 1H,  $J = 6.8, 11.2$  Hz), 4.54 (d, 1H,  $J = 8.2$  Hz), 4.75 (2H), 5.08 (dd, 1H,  $J = 3.5, 10.7$  Hz), 5.35 (d, 1H,  $J = 3.5$  Hz), 5.50 (d, 1H,  $J = 9.0$  Hz);  $^{13}\text{C NMR}$  ( $\text{CDCl}_3$ ):  $\delta$  15.3, 20.64, 20.75, 20.88, 22.2, 23.0, 25.0, 31.5, 34.2, 40.2, 47.6, 56.0, 61.5, 67.1, 70.5, 71.1, 77.9, 78.7, 93.4, 97.9, 170.4, 170.6, 171.4; MS (ESI)  $m/z$  calcd for  $\text{C}_{24}\text{H}_{38}^{35}\text{Cl}_3\text{NO}_{11}\text{S}$  653.12; found (%) 676.09 ( $[\text{M}(^{35}\text{Cl}_3)+\text{Na}]^+$ , 95), 678.05 ( $[\text{M}(^{35}\text{Cl}_2+^{37}\text{Cl})+\text{Na}]^+$ , 100), 680.07 ( $[\text{M}(^{35}\text{Cl}+^{37}\text{Cl}_2)+\text{Na}]^+$ , 40).

## L-Menthyl

### 3,6-di-O-acetyl-4-O-(2,3,4,6-tetra-O-acetyl- $\beta$ -D-galactopyranosyl)-2-deoxy-2-(2,2,2-trichloroethylsulfonyl)amido- $\beta$ -D-glucopyranoside (10c)

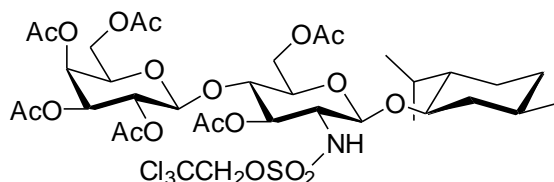

$R_f$  0.30 (3:2 hexane/EtOAc);  $[\alpha]_D^{25}$  -32.7 (c 1.0,  $\text{CHCl}_3$ );  $^1\text{H NMR}$  ( $\text{CDCl}_3$ ):  $\delta$  0.72 (d, 3H,  $J = 6.8$  Hz), 0.80 (m, 1H), 0.86 (d, 3H,  $J = 7.0$  Hz), 0.93 (d, 3H,  $J = 6.4$  Hz), 0.96 (m, 1H), 0.99 (q, 1H,  $J = 11.6$  Hz), 1.30 (m, 2H), 1.66 (m, 2H), 1.98 (s, 3H), 2.05 (m, 1H), 2.05 (s, 3H), 2.08 (s, 3H), 2.10 (s, 3H), 2.15 (m, 1H), 2.16 (s, 6H), 3.47 (q, 1H,  $J = 9.2$  Hz), 3.53 (dt, 1H,  $J = 3.9, 10.7$  Hz), 3.69 (m, 1H), 3.79 (t, 1H,  $J = 9.7$  Hz), 3.91 (t, 1H,  $J = 6.7$  Hz), 4.10 (dd, 1H,  $J = 7.0, 10.5$  Hz), 4.10 (m, 1H), 4.16 (dd, 1H,  $J = 6.4, 11.1$  Hz), 4.52 (d, 1H,  $J = 7.8$  Hz), 4.55 (d, 1H,  $J = 8.2$  Hz), 4.74 (s, 2H), 5.00 (dd, 1H,  $J = 3.4, 10.4$  Hz), 5.09 (1H), 5.10 (1H), 5.37 (d, 1H,  $J = 3.4$  Hz), 5.76 (d, 1H,  $J = 9.1$  Hz);  $^{13}\text{C NMR}$  ( $\text{CDCl}_3$ ):  $\delta$  15.3, 20.52, 20.59, 20.63, 20.73, 20.77, 20.98, 22.3, 23.1, 25.1, 31.5, 34.2, 40.0, 47.6, 59.0, 60.9, 62.1, 66.7, 69.1, 70.76, 70.84, 72.3, 73.2, 76.4, 77.3, 78.7, 93.5, 97.0, 101.1, 169.4, 170.1 (2C), 170.35, 170.43, 171.4; MS (ESI)  $m/z$  calcd for  $\text{C}_{36}\text{H}_{54}^{35}\text{Cl}_3\text{NO}_{19}\text{S}$  941.21; found (%) 964.26 ( $[\text{M}(^{35}\text{Cl}_3)+\text{Na}]^+$ , 81), 966.27 ( $[\text{M}(^{35}\text{Cl}_2+^{37}\text{Cl})+\text{Na}]^+$ , 100), 968.27

([M(<sup>35</sup>Cl+<sup>37</sup>Cl<sub>2</sub>)+Na]<sup>+</sup>, 41).

**6-*O*-[3,4,6-tri-*O*-Acetyl-2-deoxy-2-(2,2,2-trichloroethoxysulfonyl)amido-β-D-galactopyranosyl]-1,2:3,4-di-*O*-isopropylidene-α-D-galactopyranose (11b)**

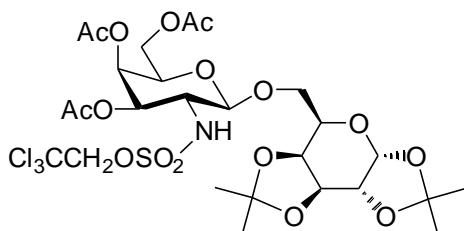

$R_f$  0.27 (3:2 hexane/EtOAc);  $[\alpha]_D^{25}$  -46.4 (c 2.0, CHCl<sub>3</sub>); <sup>1</sup>H NMR (CDCl<sub>3</sub>): δ 1.32 (s, 3H), 1.34 (s, 3H), 1.46 (s, 3H), 1.60 (s, 3H), 2.05 (s, 3H), 2.07 (s, 3H), 2.15 (s, 3H), 3.72 (ddd, 1H,  $J$  = 7.2, 8.2, 10.9 Hz), 3.92 (dd, 1H,  $J$  = 8.8, 12.7 Hz), 3.95 (dt, 1H,  $J$  = 0.8, 6.7 Hz), 4.00 (dd, 1H,  $J$  = 2.5, 12.6 Hz), 4.12 (dd, 1H,  $J$  = 6.7, 11.2 Hz), 4.17 (dd, 1H,  $J$  = 2.0, 8.0 Hz), 4.19 (dd, 1H,  $J$  = 6.6, 11.2 Hz), 4.34 (dd, 1H,  $J$  = 2.3, 5.2 Hz), 4.59 (dd, 1H,  $J$  = 2.3, 7.9 Hz), 4.71 (d, 1H,  $J$  = 11 Hz), 4.74 (d, 1H,  $J$  = 11 Hz), 4.83 (d, 1H,  $J$  = 8.4 Hz), 5.04 (dd, 1H,  $J$  = 3.3, 10.9 Hz), 5.37 (dd, 1H,  $J$  = 0.8, 3.3 Hz), 5.59 (d, 1H,  $J$  = 5.2 Hz), 5.82 (d, 1H,  $J$  = 8.4 Hz); <sup>13</sup>C NMR (CDCl<sub>3</sub>): δ 20.6, 20.7, 24.2, 24.7, 25.87, 25.92, 55.8, 61.2, 66.8, 68.5, 68.8, 70.0, 70.6, 70.84, 70.88, 70.95, 78.7, 93.7, 96.2, 101.2, 109.2, 109.5, 170.1, 170.4, 170.6; MS (ESI)  $m/z$  calcd for C<sub>26</sub>H<sub>38</sub><sup>35</sup>Cl<sub>3</sub>NO<sub>16</sub>S 757.10; found (%) 780.05 ([M(<sup>35</sup>Cl<sub>3</sub>)+Na]<sup>+</sup>, 92), 782.04 ([M(<sup>35</sup>Cl<sub>2</sub>+<sup>37</sup>Cl)+Na]<sup>+</sup>, 100), 784.02 ([M(<sup>35</sup>Cl+<sup>37</sup>Cl<sub>2</sub>)+Na]<sup>+</sup>, 39).

**Methyl**

**6-*O*-[3,4,6-tri-*O*-acetyl-2-deoxy-2-(2,2,2-trichloroethoxysulfonyl)amido-β-D-galactopyranosyl]-2,3,4-tri-*O*-benzyl-α-D-glucopyranoside (12b)**

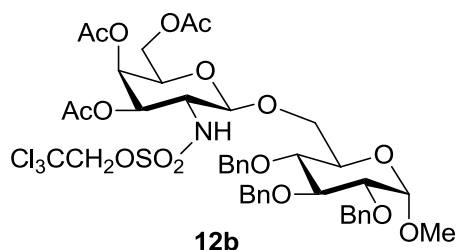

$R_f$  0.25 (3:2 hexane/EtOAc); <sup>1</sup>H NMR (CDCl<sub>3</sub>): δ 2.01 (s, 3H), 2.06 (s, 3H), 2.12 (s, 3H), 3.40 (s, 3H), 3.45 (dd, 1H,  $J$  = 8.8, 10.0 Hz), 3.65 (dd, 1H,  $J$  = 6.0, 11.0 Hz), 3.70 (dt, 1H,  $J$  = 10.7, 7.7 Hz), 3.81 (dt, 1H,  $J$  = 1.0, 7.0 Hz), 3.86 (m, 1H), 4.00 (t, 1H,  $J$  = 9.3 Hz), 4.10 (m, 3H), 4.28 (d, 1H,  $J$  = 8.4 Hz), 4.60 (d, 1H,  $J$  = 3.3 Hz), 4.64 (s, 2H), 4.64 (d, 2H,  $J$  = 11.9 Hz), 4.79 (d, 1H,  $J$  = 12.1 Hz),

4.81 (d, 1H,  $J = 11.1$  Hz), 4.89 (d, 1H,  $J = 11.5$  Hz), 4.96 (dd, 1H,  $J = 3.4, 11.0$  Hz), 4.99 (d, 1H,  $J = 11.2$  Hz), 5.07 (d, 1H,  $J = 7.4$  Hz), 5.34 (dd, 1H,  $J = 0.9, 3.4$  Hz), 7.27-7.40 (m, 15H); MS (ESI)  $m/z$  calcd for  $C_{42}H_{50}^{35}Cl_3NO_{16}S$  961.19; found (%) 984.18 ( $[M(^{35}Cl_3)+Na]^+$ , 100), 986.17 ( $[M(^{35}Cl_2+^{37}Cl)+Na]^+$ , 95), 988.17 ( $[M(^{35}Cl+^{37}Cl_2)+Na]^+$ , 32)..

### Cholest-5-en-3 $\beta$ -yl

#### 3,4,6-tri-*O*-acetyl-2-deoxy-2-(2,2,2-trichloroethoxysulfonyl)amido- $\beta$ -D-galactopyranoside (13b)

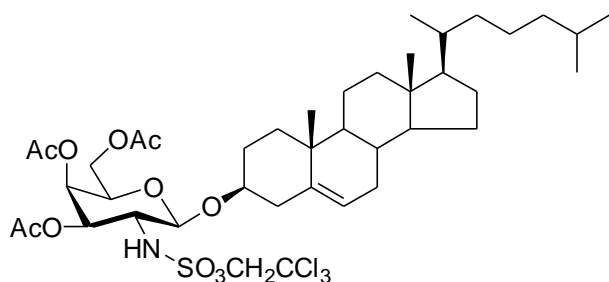

$R_f$  0.30 (3:1 hexane/EtOAc);  $[\alpha]_D^{25}$  -32.0 (c 2.0,  $CHCl_3$ );  $^1H$  NMR ( $CDCl_3$ ):  $\delta$  0.67 (s, 3H), 0.86 (d, 3H,  $J = 6.6$  Hz), 0.87 (d, 3H,  $J = 6.6$  Hz), 0.91 (d, 3H,  $J = 6.4$  Hz), 1.00 (s, 3H), 0.90-2.05 (m, 26H), 2.05 (s, 3H), 2.10 (s, 3H), 2.17 (s, 3H), 2.33 (m, 1H), 2.39 (ddd, 1H,  $J = 2.1, 4.8, 13.1$  Hz), 3.62 (tt, 1H,  $J = 4.7, 11.4$  Hz), 3.74 (dt, 1H,  $J = 11.1, 8.5$  Hz), 3.90 (t, 1H,  $J = 7.0$  Hz), 4.10 (dd, 1H,  $J = 7.0, 11.2$  Hz), 4.19 (dd, 1H,  $J = 6.6, 11.2$  Hz), 4.57 (d, 1H,  $J = 8.2$  Hz), 4.73 (s, 2H), 5.01 (dd, 1H,  $J = 2.4, 8.8$  Hz), 5.05 (dd, 1H,  $J = 3.5, 11.0$  Hz), 5.37 (d, 1H,  $J = 3.5$  Hz);  $^{13}C$  NMR ( $CDCl_3$ ):  $\delta$  11.8, 18.7, 19.3, 20.68, 20.71, 20.9, 21.0, 22.5, 22.8, 23.8, 24.3, 28.0, 28.2, 29.6, 31.8, 31.9, 35.8, 36.2, 36.7, 37.2, 38.5, 39.5, 39.7, 42.3, 50.1, 56.1, 56.7, 61.3, 66.9, 70.7, 70.9, 78.7, 79.7, 93.4, 99.2, 122.5, 139.9, 170.2, 170.4, 171.2; MS (ESI)  $m/z$  calcd for  $C_{41}H_{64}^{35}Cl_3NO_{11}S$  883.33; found (%) 906.33 ( $[M(^{35}Cl_3)+Na]^+$ , 94), 908.25 ( $[M(^{35}Cl_2+^{37}Cl)+Na]^+$ , 100), 910.30 ( $[M(^{35}Cl+^{37}Cl_2)+Na]^+$ , 34).

#### Tetradecyl 3,4,6-tri-*O*-acetyl-2-amino-2-deoxy- $\beta$ -D-glucopyranoside (15)

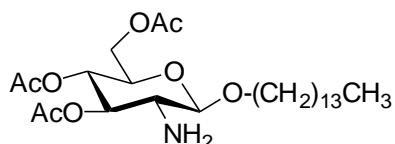

$R_f$  0.50 (EtOAc);  $^1H$  NMR ( $CDCl_3$ ):  $\delta$  0.88 (t, 3H,  $J = 6.9$  Hz), 1.25 (s-like, 22H), 1.62 (m, 2H), 2.02 (s, 3H), 2.074 (s, 3H), 2.077 (s, 3H), 2.93 (dd, 1H,  $J = 8.2, 9.7$  Hz), 3.51 (dt, 1H,  $J = 9.5, 7.0$  Hz), 3.68 (ddd, 1H,  $J = 2.4, 4.9, 9.6$  Hz), 3.90 (dt, 1H,  $J = 9.5, 6.7$  Hz), 4.11 (dd, 1H,  $J = 2.4, 12.2$

Hz), 4.24 (d, 1H,  $J = 8.0$  Hz), 4.29 (dd, 1H,  $J = 4.9, 12.2$  Hz), 4.98 (t, 1H,  $J = 9.3$  Hz), 5.01 (t, 1H,  $J = 9.3$  Hz).

### Tetradecyl 2-acetamido-3,4,6-tri-*O*-acetyl-2-deoxy- $\beta$ -D-glucopyranoside (**16**)

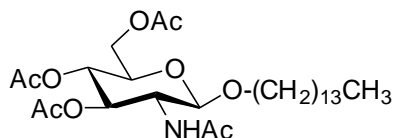

To a mixture of **3a** (43 mg, 0.06 mmol) and powdered anhydrous  $\text{CuSO}_4$  (5 mg, 0.03 mmol) in tetrahydrofuran (1 mL) was added acetic acid (0.1 mL) and acetic anhydride (0.1 mL). Zinc (42 mg, 0.6 mmol) was added in 2 portions for 10 min, and the resulting dark-grey suspension was stirred for 3 h. The reaction mixture was filtered and washed with EtOAc, and the combined filtrates were mixed with  $\text{H}_2\text{O}$ , and the layers were separated. The organic layer was washed with aq. NaCl, and the combined aqueous layers were extracted with EtOAc. The combined organic extracts were dried ( $\text{Na}_2\text{SO}_4$ ) and concentrated to give a residue, which was purified by silica gel chromatography eluting with hexane-EtOAc (1:2) to give **16** (26 mg, 80%) as a colorless solid.

mp 126-129 °C;  $R_f$  0.30 (1:2 hexane/EtOAc);  $[\alpha]_D^{25} -6.3$  (c 1.0,  $\text{CHCl}_3$ );  $^1\text{H NMR}$  ( $\text{CDCl}_3$ ):  $\delta$  0.88 (t, 3H,  $J = 6.9$  Hz), 1.25 (s-like, 22H), 1.57 (m, 2H), 1.95 (s, 3H), 2.03 (s, 3H), 2.04 (s, 3H), 2.09 (s, 3H), 3.47 (dt, 1H,  $J = 9.6, 6.9$  Hz), 3.71 (ddd, 1H,  $J = 2.5, 4.7, 10.0$  Hz), 3.82 (dt, 1H,  $J = 10.4, 8.5$  Hz), 3.86 (dt, 1H,  $J = 9.6, 6.8$  Hz), 4.13 (dd, 1H,  $J = 2.3, 12.3$  Hz), 4.27 (dd, 1H,  $J = 4.7, 12.3$  Hz), 4.69 (d, 1H,  $J = 8.2$  Hz), 5.07 (t, 1H,  $J = 9.6$  Hz), 5.32 (dd, 1H,  $J = 9.4, 10.5$  Hz), 5.64 (d, 1H,  $J = 8.5$  Hz);  $^{13}\text{C NMR}$  ( $\text{CDCl}_3$ ):  $\delta$  14.1, 20.6, 20.7, 20.8, 22.7, 25.8, 29.34, 29.36, 29.49, 29.58, 29.64, 31.9, 59.0, 62.0, 68.4, 70.6, 71.8, 72.8, 78.7, 93.4, 100.8, 169.3, 170.7, 171.6; Anal. Calcd for  $\text{C}_{28}\text{H}_{49}\text{NO}_9$ : C, 61.86; H, 9.08; N, 2.58. Found: C, 61.50; H, 8.95; N, 2.53.

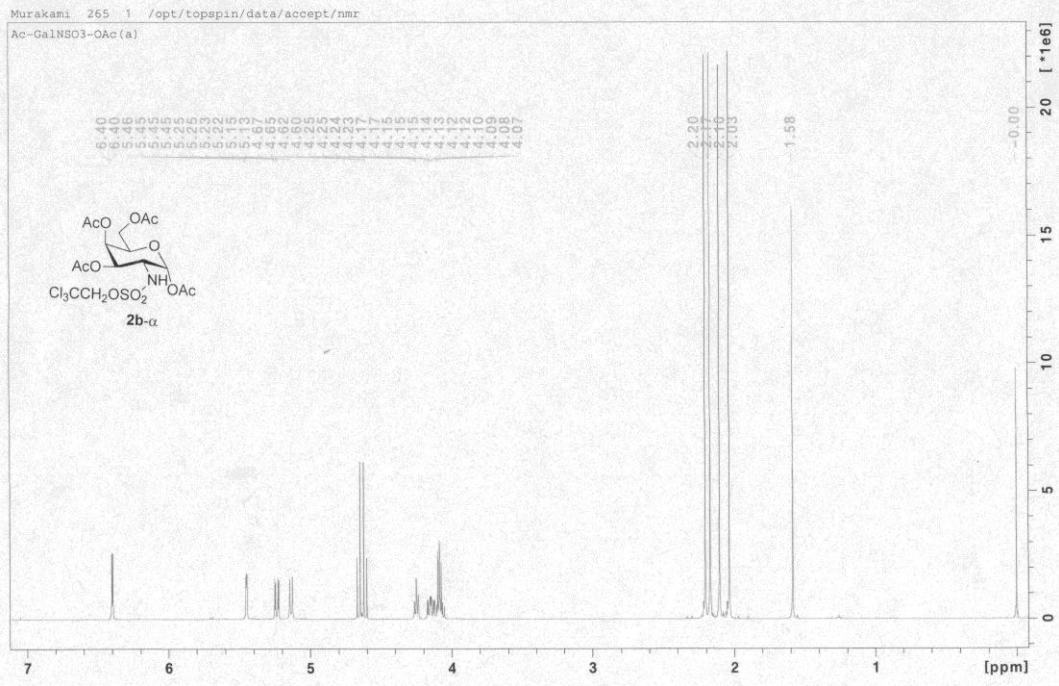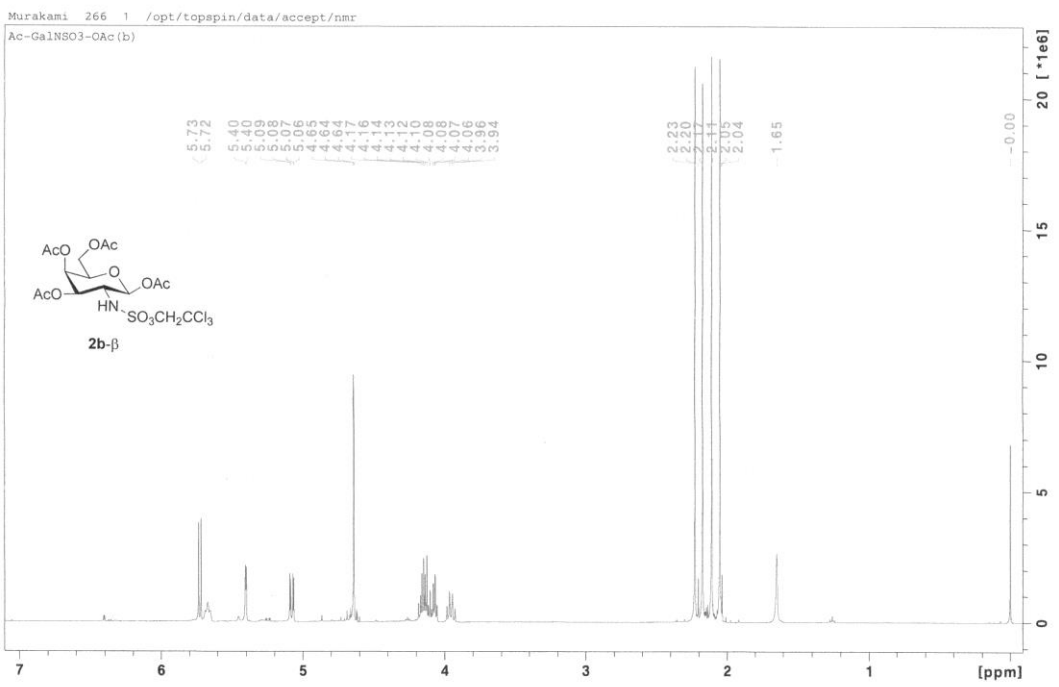

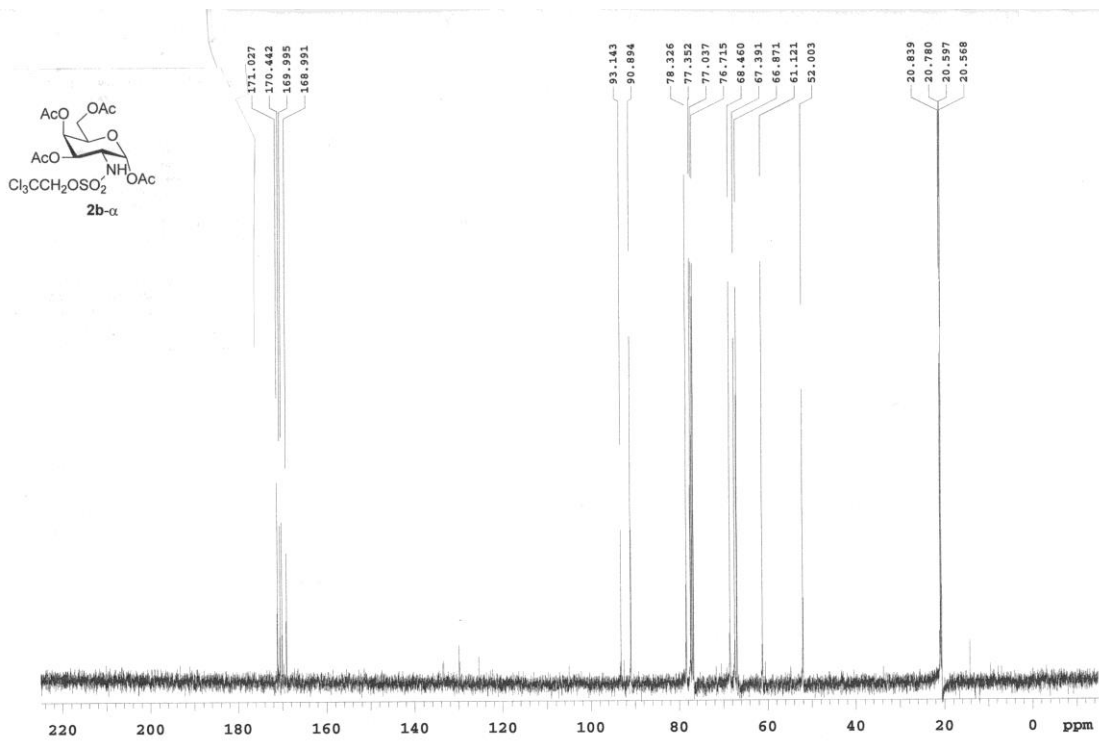

Pulse Sequence: s2pul  
 Solvent: cdcl3  
 Ambient temperature  
 Sample #5, Operator: walkup

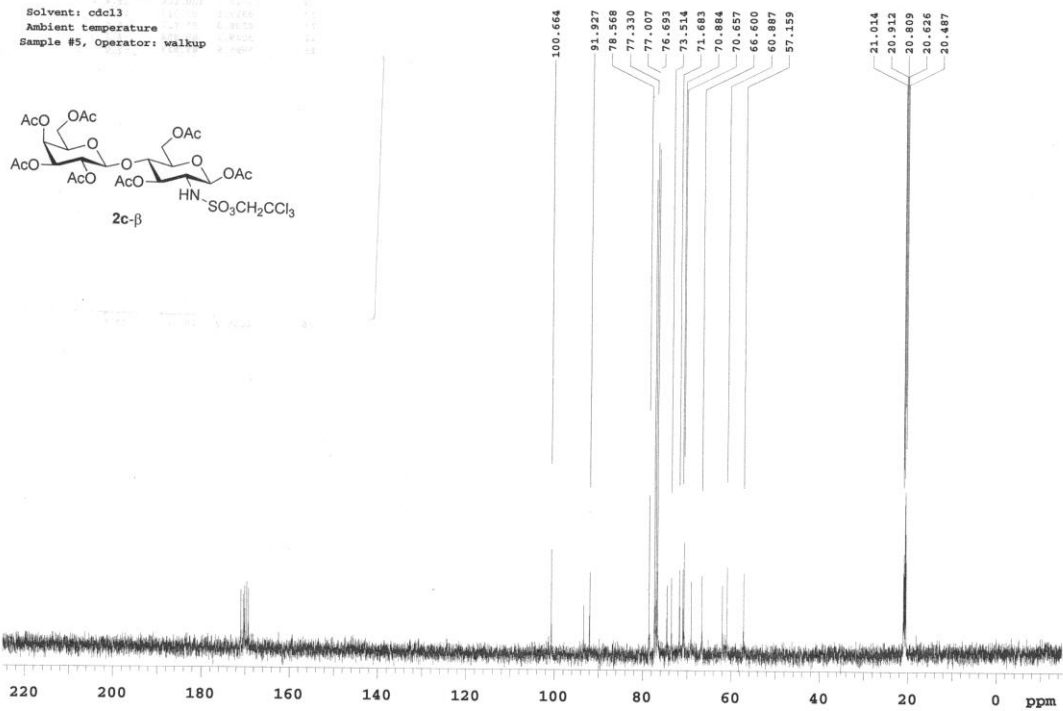

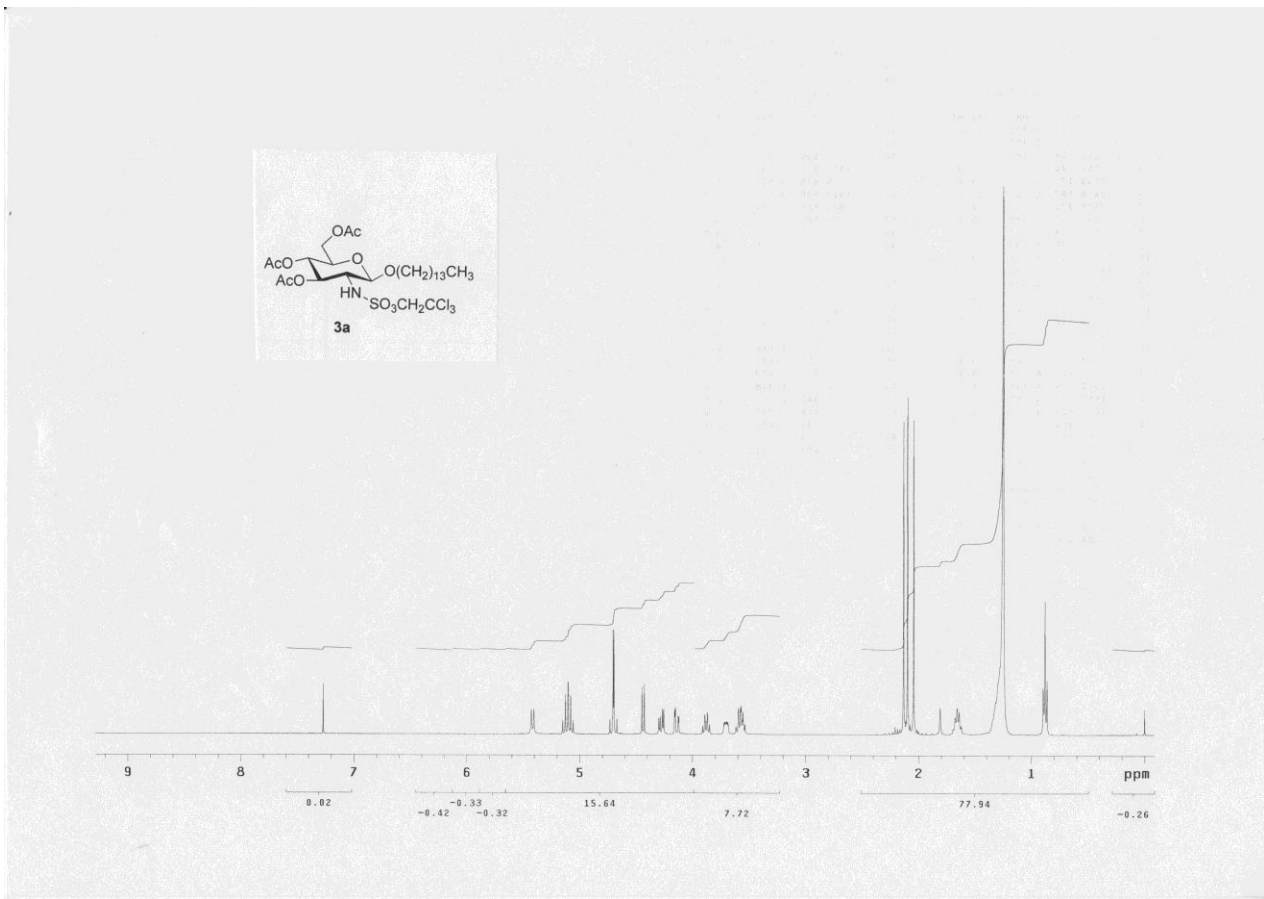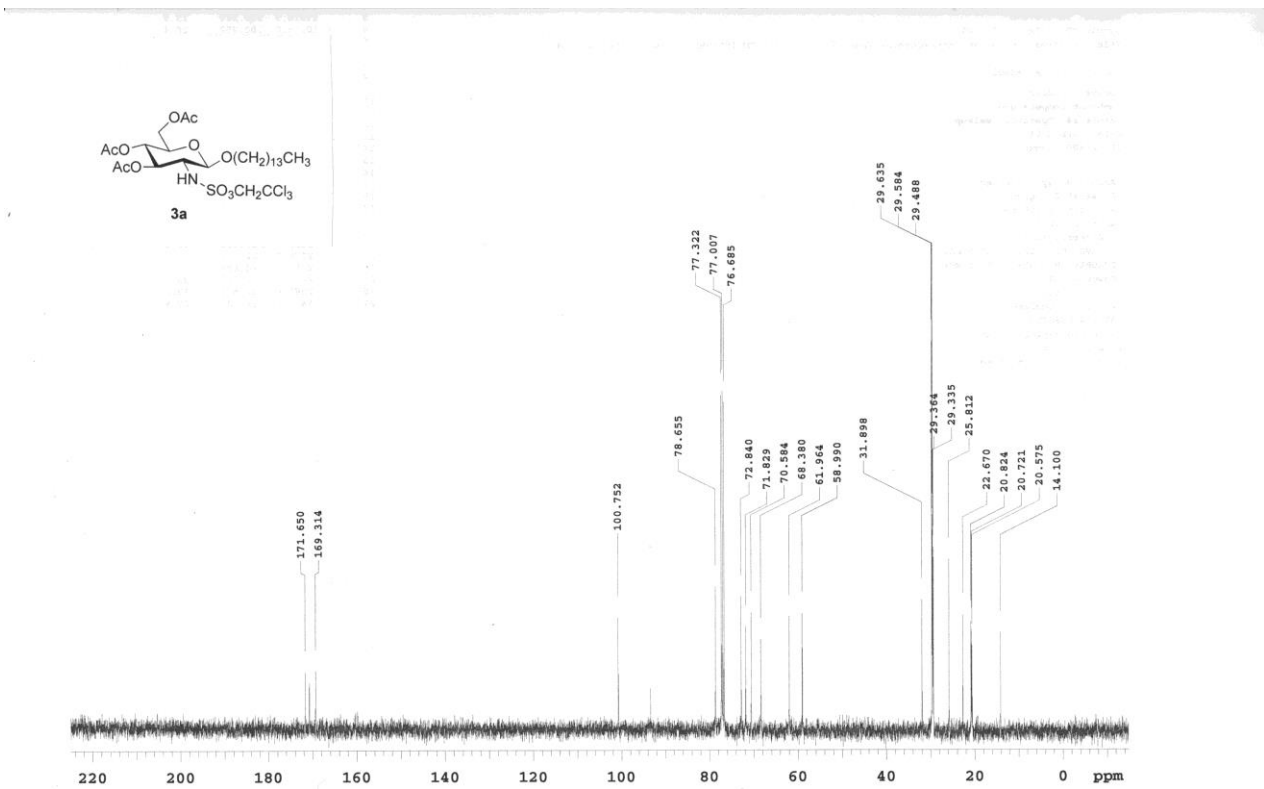

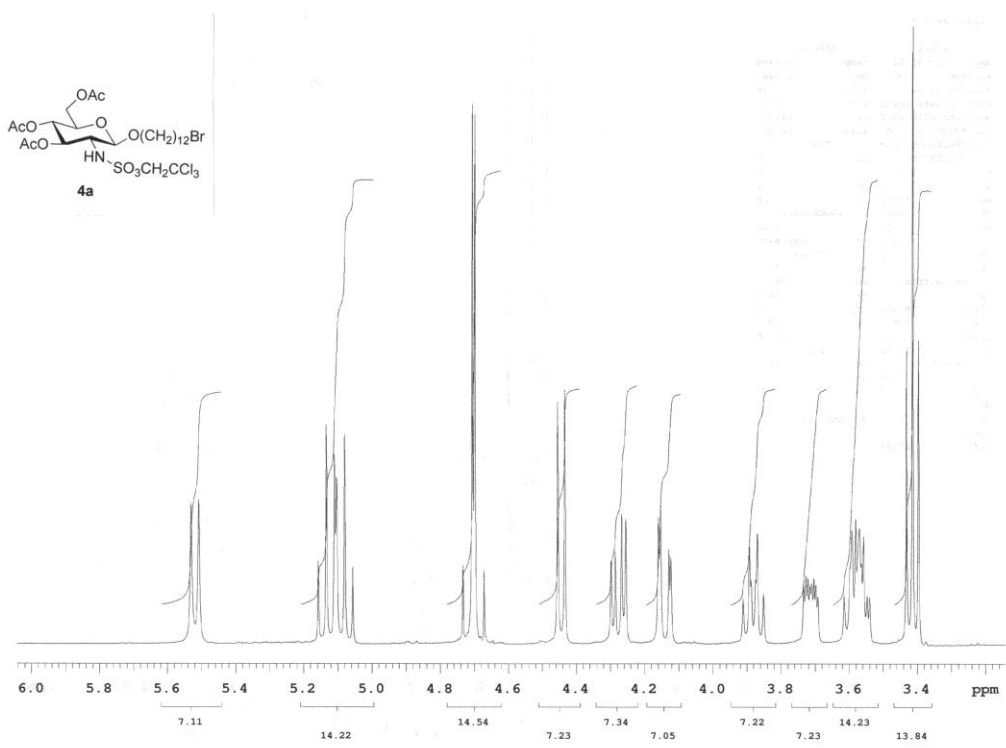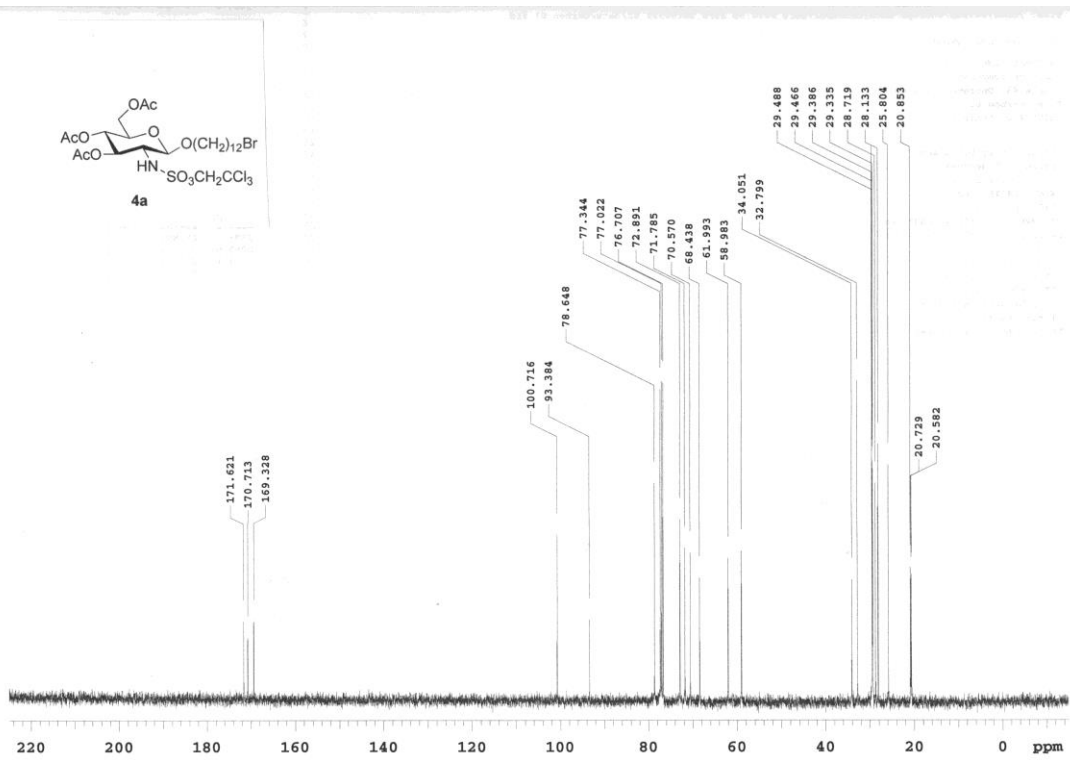



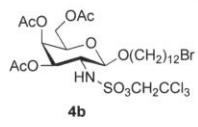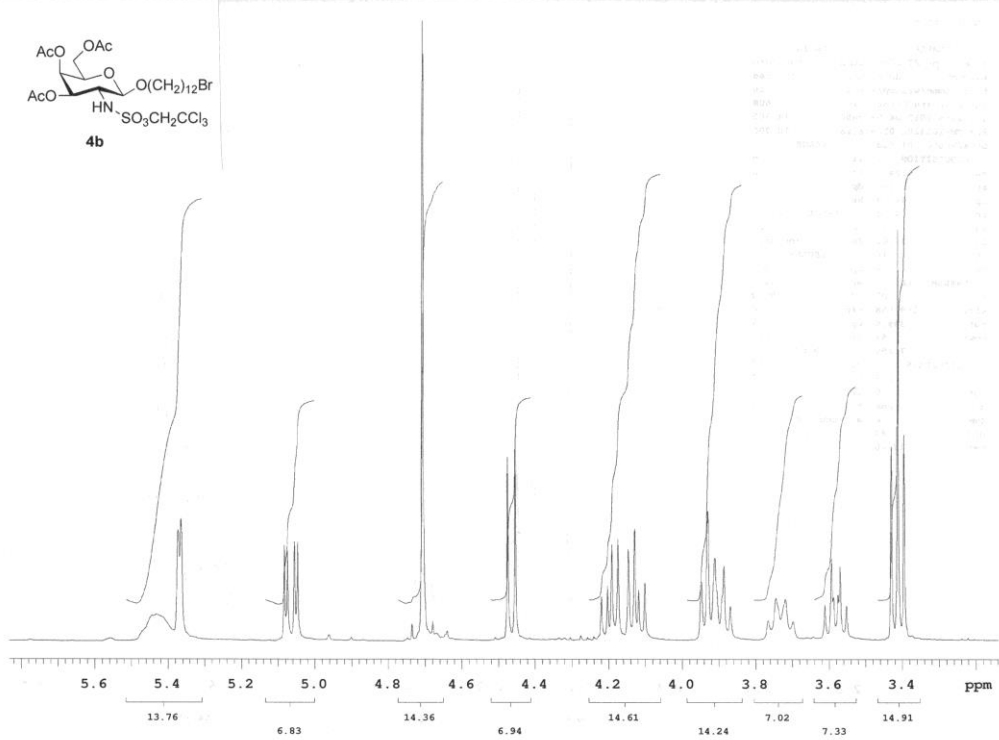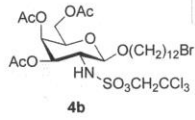

OBSERVE c13, 100.4934637 MHz  
 DECOUPLE H1, 399.6575311 MHz  
 Power 42 dB  
 continuously on  
 WALTZ-16 modulated  
 DATA PROCESSING  
 Line broadening 1.0 Hz  
 FT size 65536  
 Total time 17 min, 9 sec

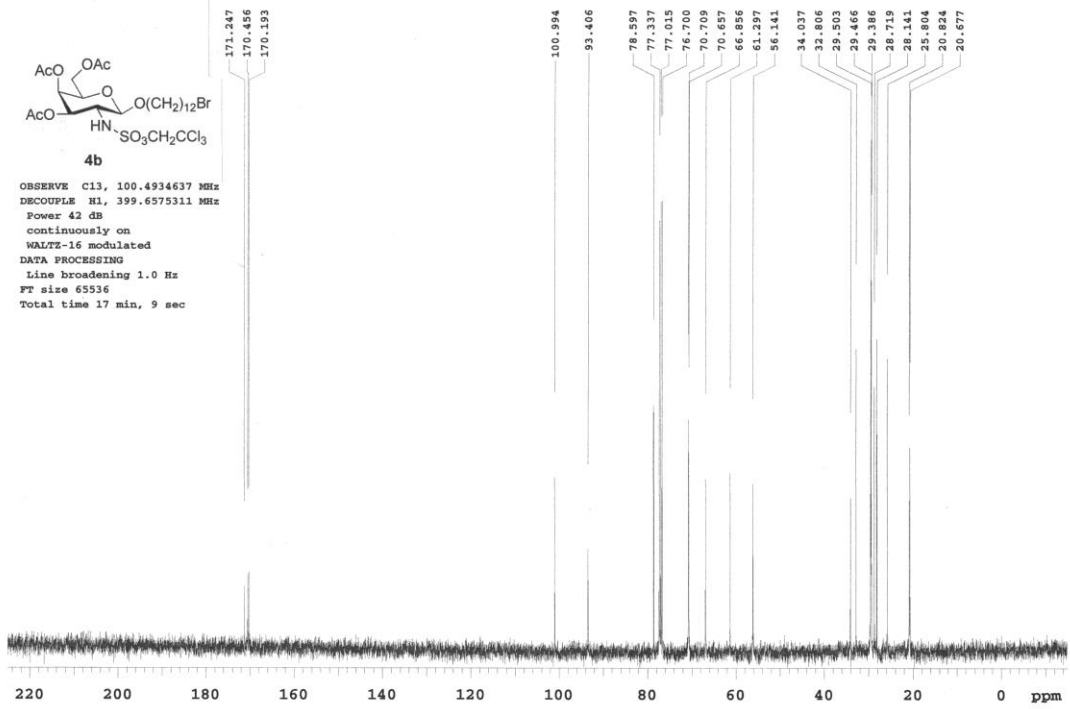



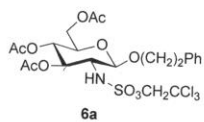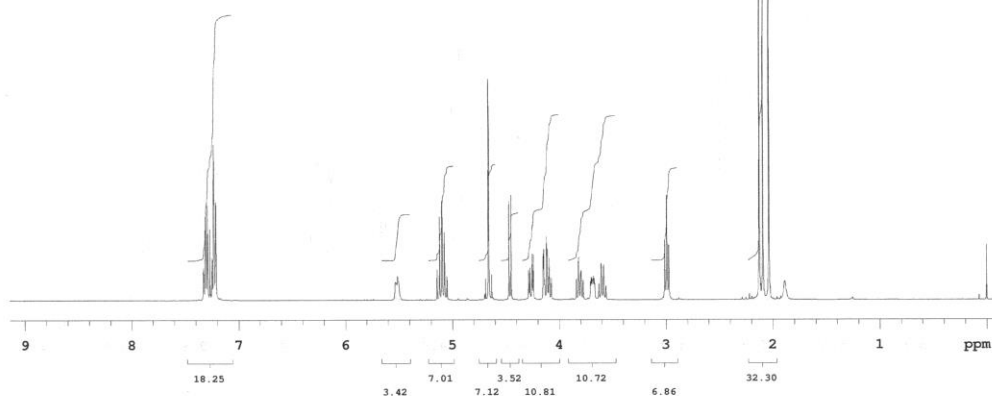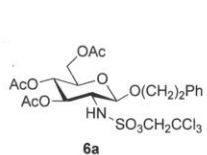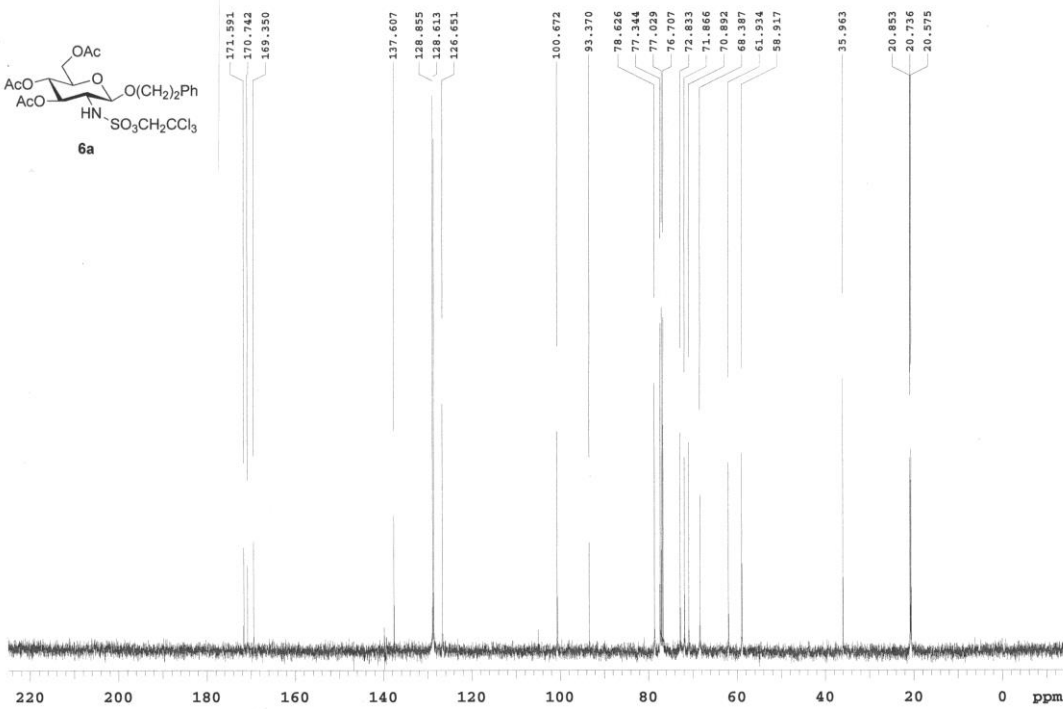

Murakami 413 1 /opt/topspin/data/accept/nmr

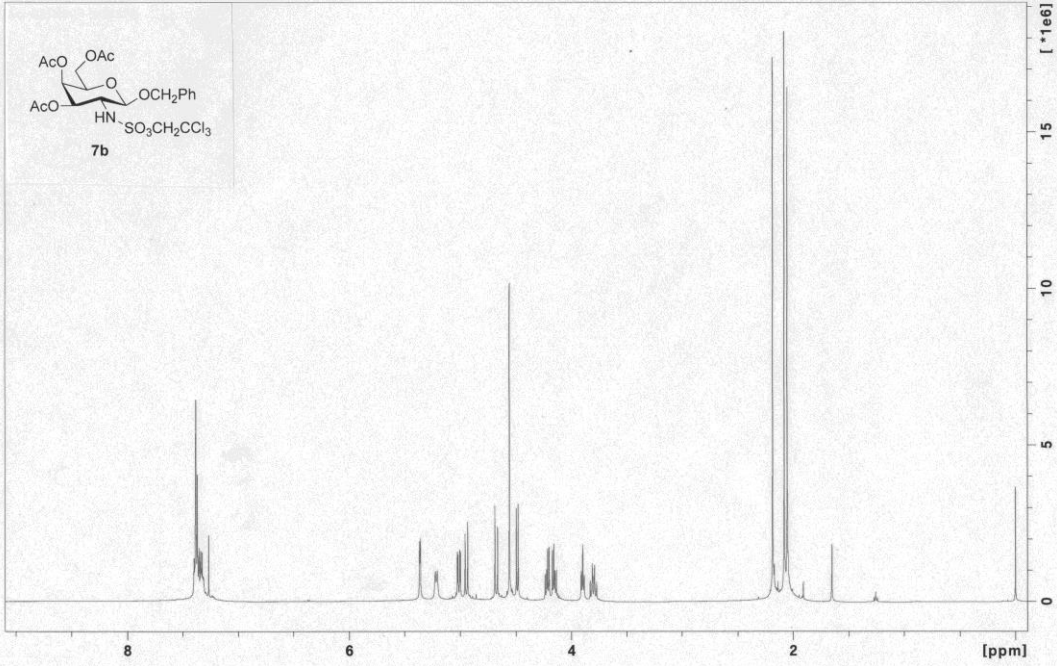

Solvent: cdcl3  
Ambient temperature  
Sample #4, Operator: walkup  
File: Carbon\_02  
INNOVA-400 "vnmr1"

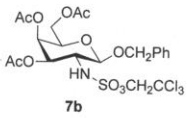

| INDEX | FREQUENCY | PPM     | HEIGHT |
|-------|-----------|---------|--------|
| 1     | 17207.8   | 171.233 | 19.1   |
| 2     | 17134.2   | 170.500 | 18.4   |
| 3     | 17104.7   | 170.207 | 20.9   |
| 4     | 13646.1   | 135.791 | 21.3   |
| 5     | 12939.5   | 128.760 | 106.7  |
| 6     | 12929.2   | 128.657 | 102.0  |
| 7     | 12912.3   | 128.489 | 52.7   |
| 8     | 9971.9    | 99.229  | 41.0   |
| 9     | 9380.1    | 93.340  | 18.7   |
| 10    | 7897.7    | 78.589  | 54.7   |
| 11    | 7771.9    | 77.337  | 85.0   |
| 12    | 7739.5    | 77.015  | 85.3   |
| 13    | 7707.8    | 76.700  | 86.3   |
| 14    | 7138.9    | 71.038  | 47.9   |
| 15    | 7123.4    | 70.884  | 42.2   |
| 16    | 7102.1    | 70.672  | 40.4   |
| 17    | 6726.7    | 66.937  | 42.0   |
| 18    | 6176.2    | 61.458  | 44.3   |
| 19    | 5628.6    | 56.009  | 37.2   |
| 20    | 2087.5    | 20.773  | 39.9   |
| 21    | 2078.0    | 20.677  | 65.7   |

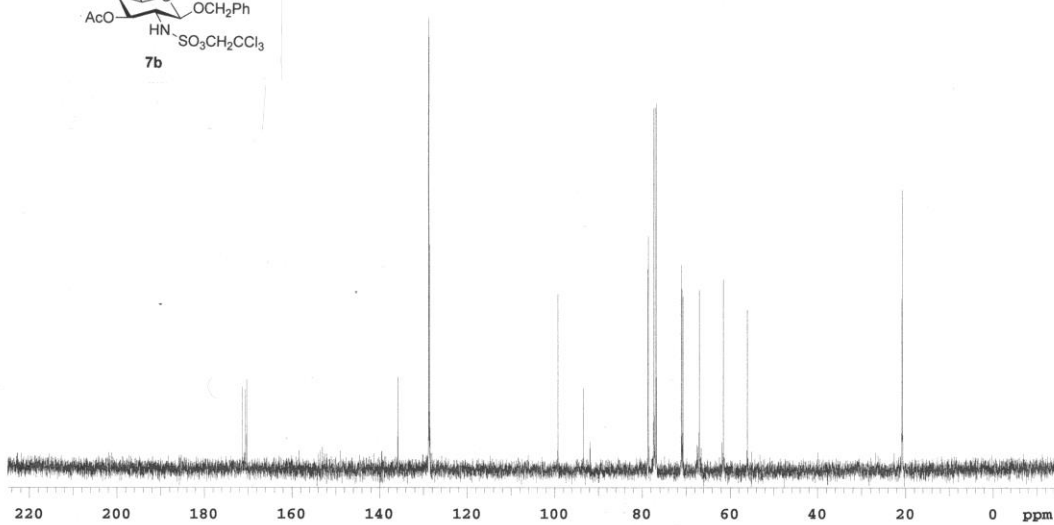

Murakami 274 1 /opt/topspin/data/accept/nmr

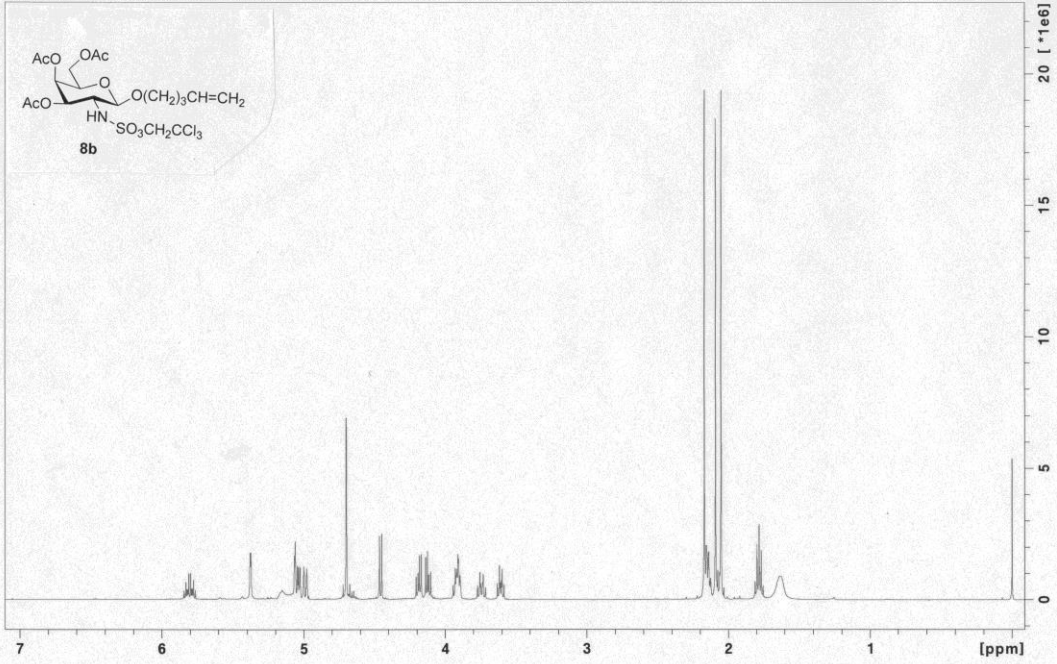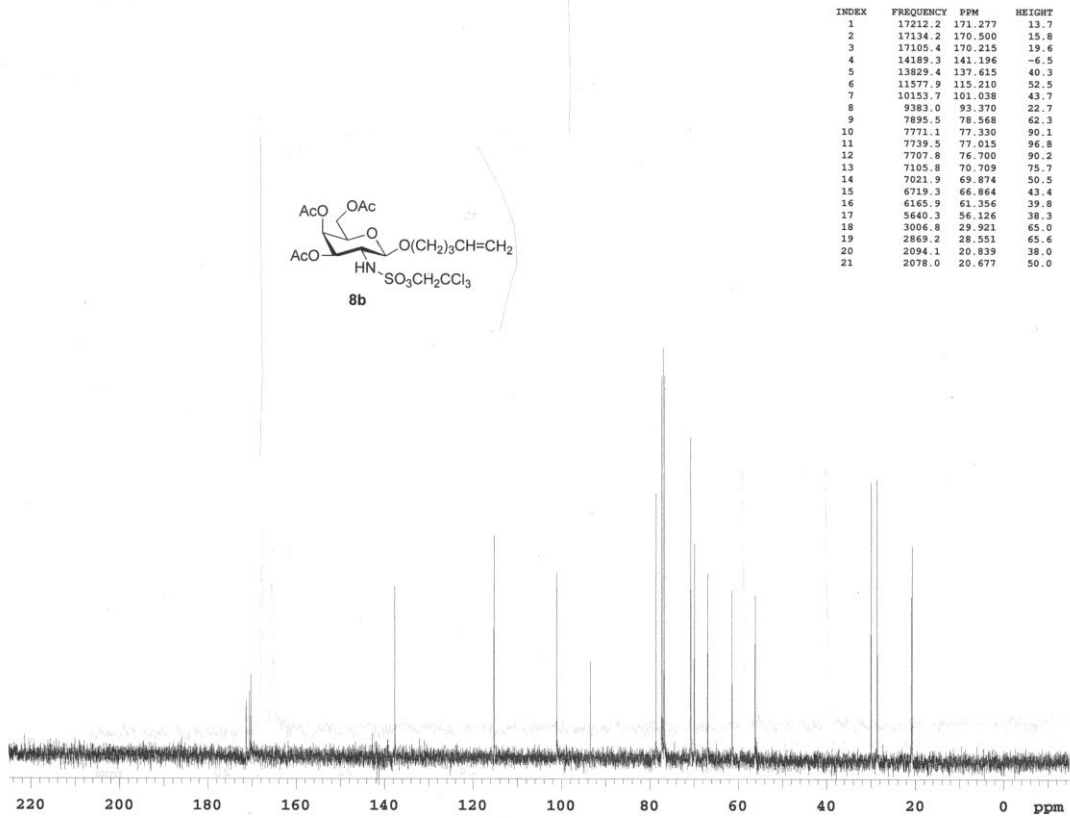

Murakami 408 1 /opt/topspin/data/accept/nmr

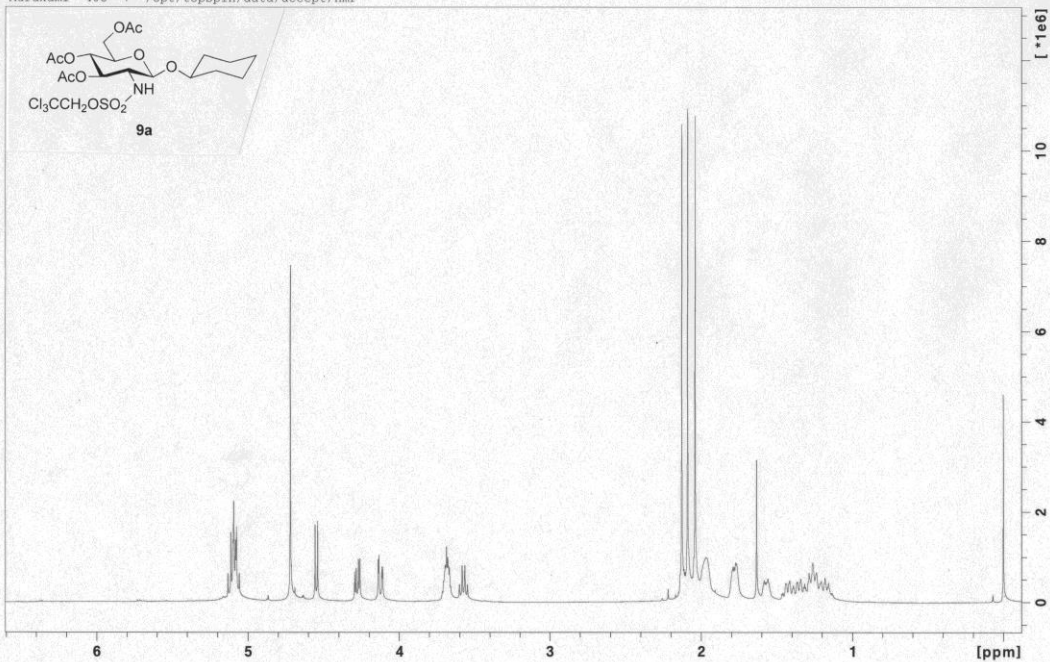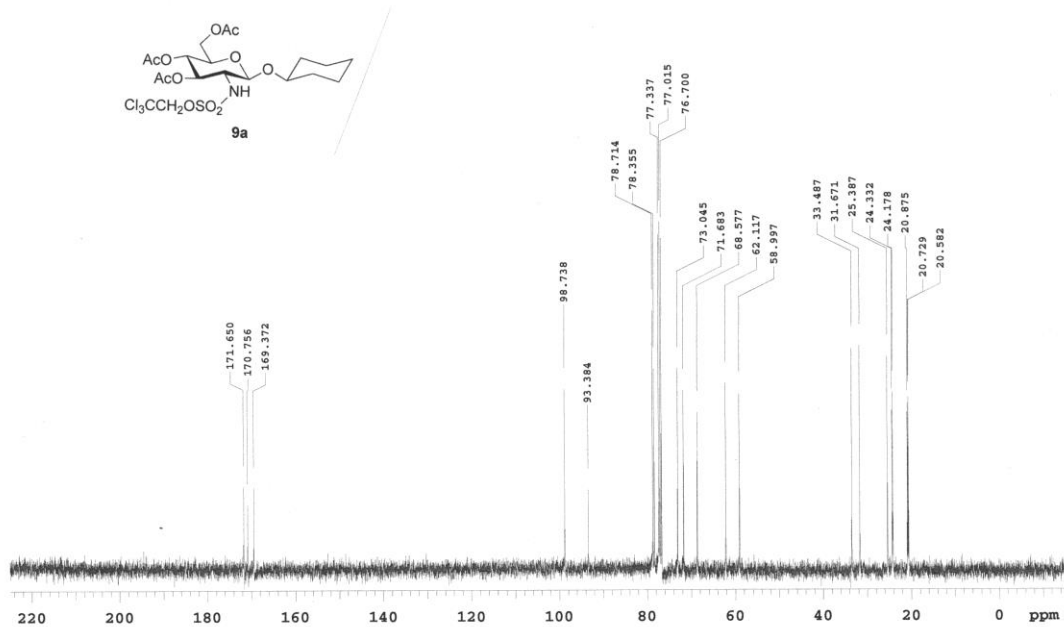

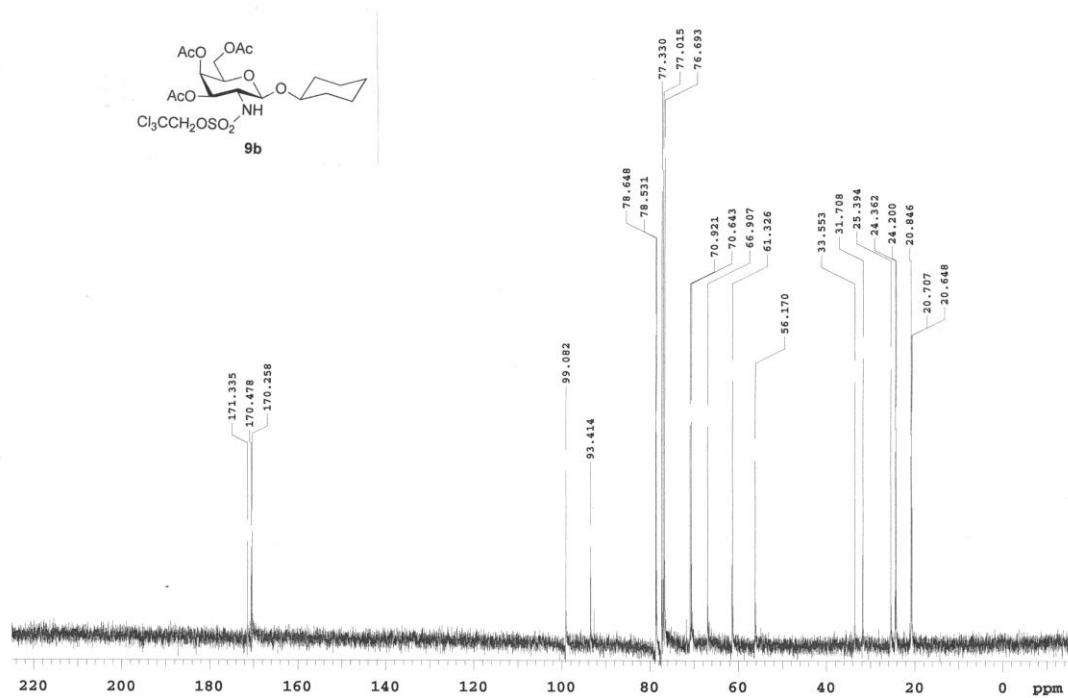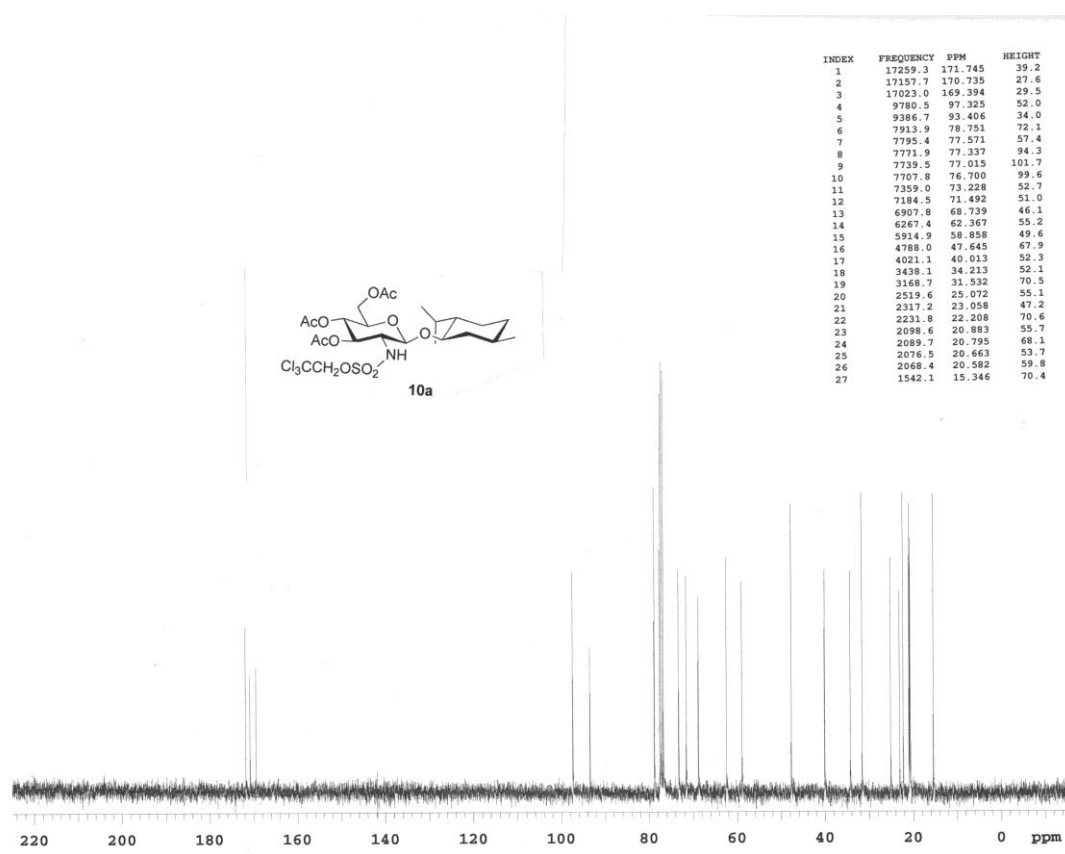

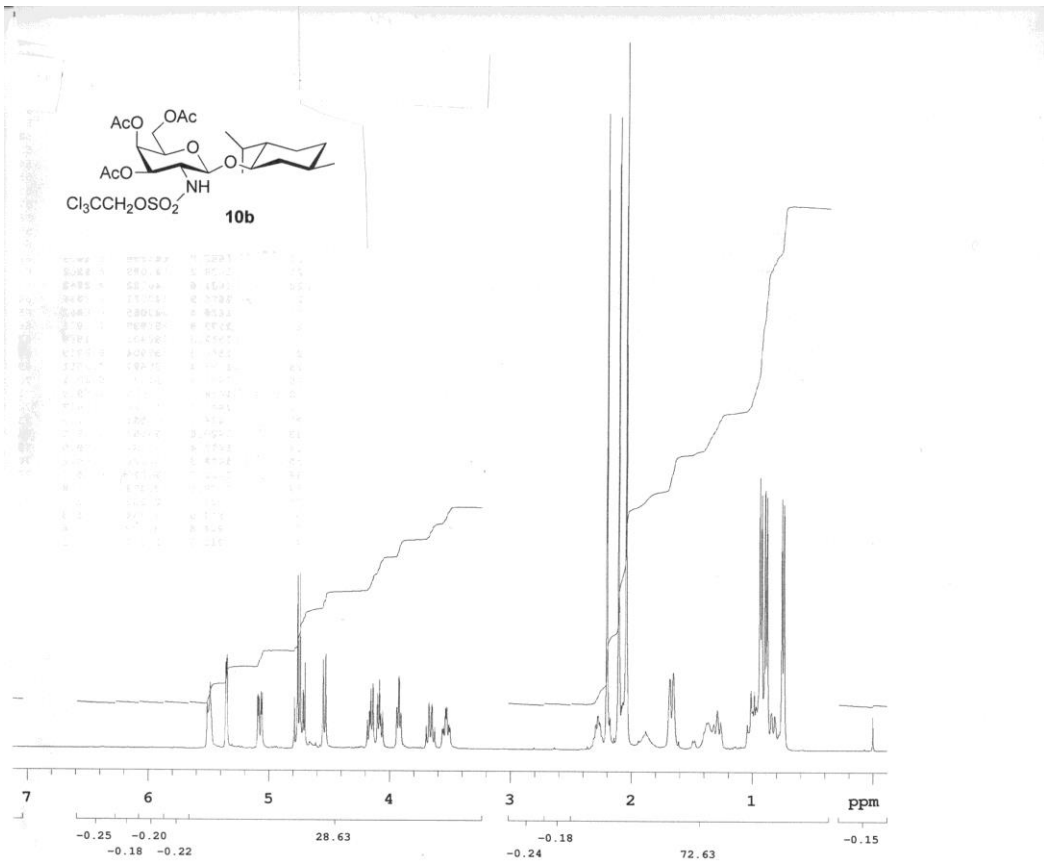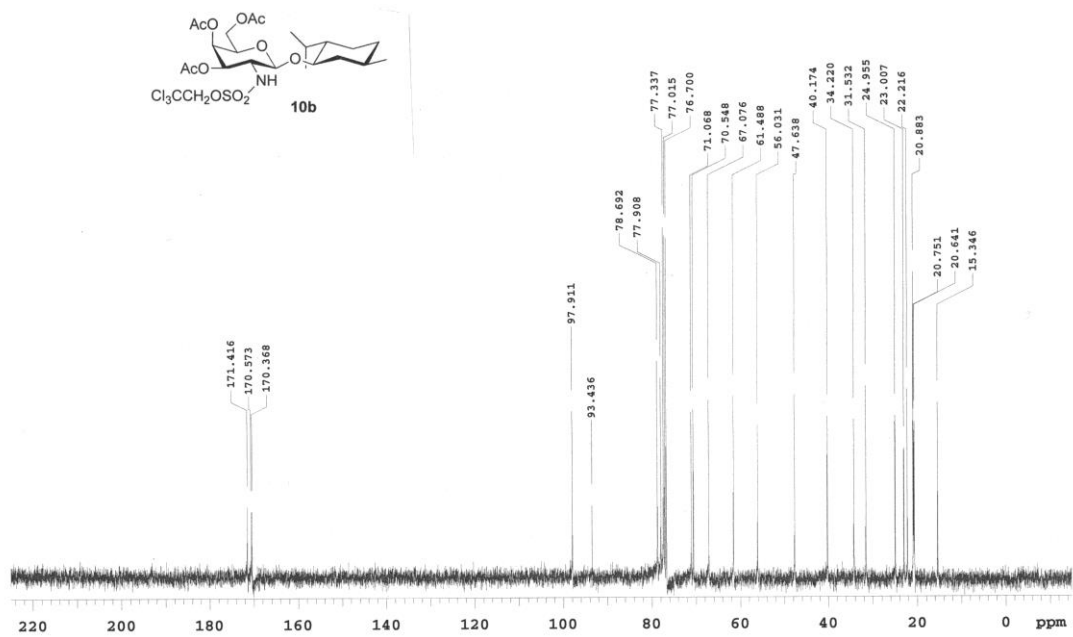



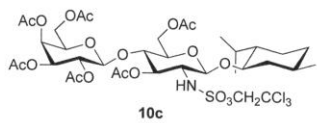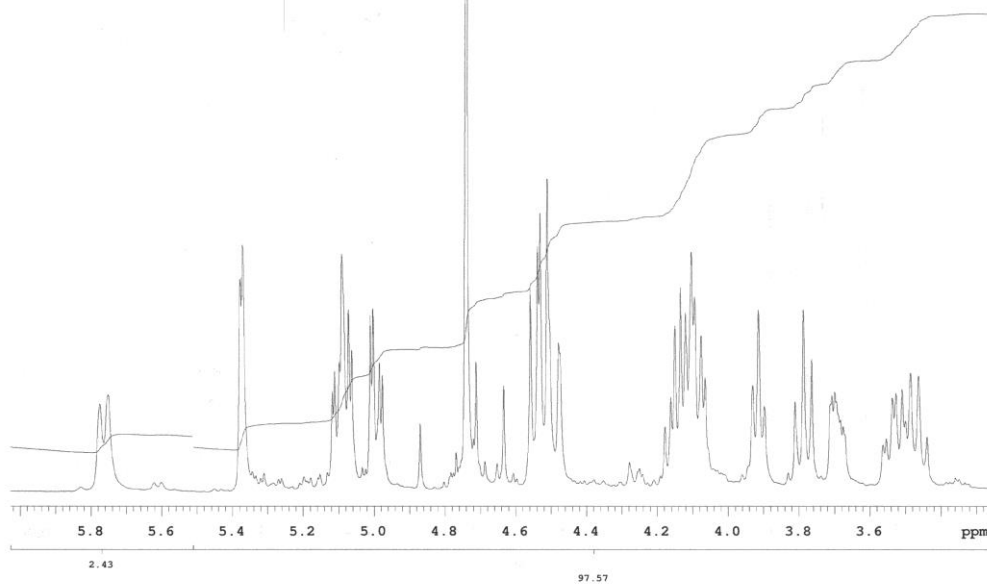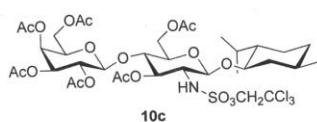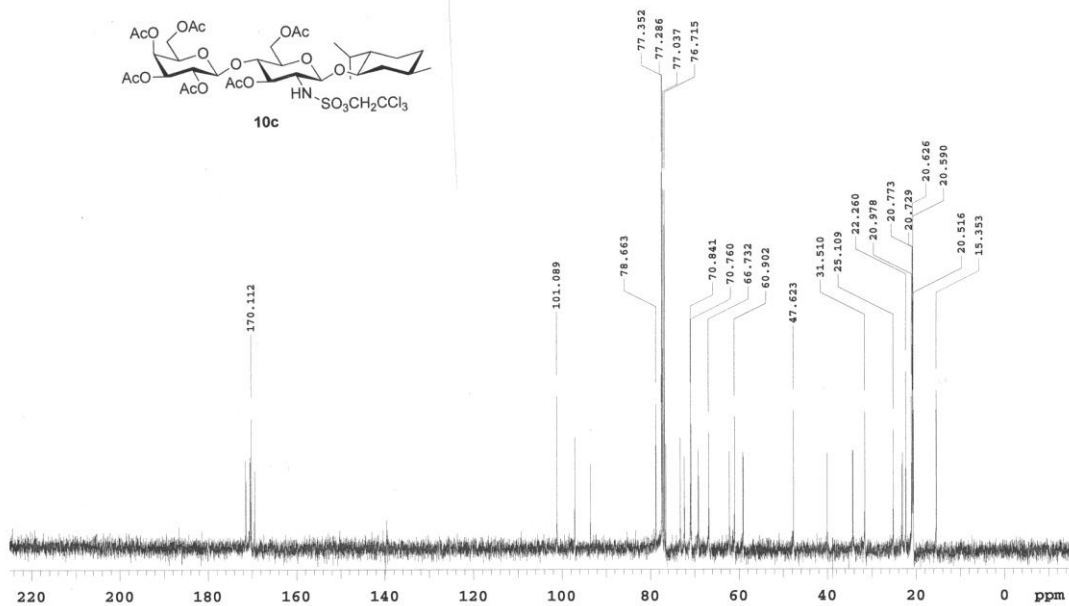

Murakami 416 1 /opt/topspin/data/accept/nmr

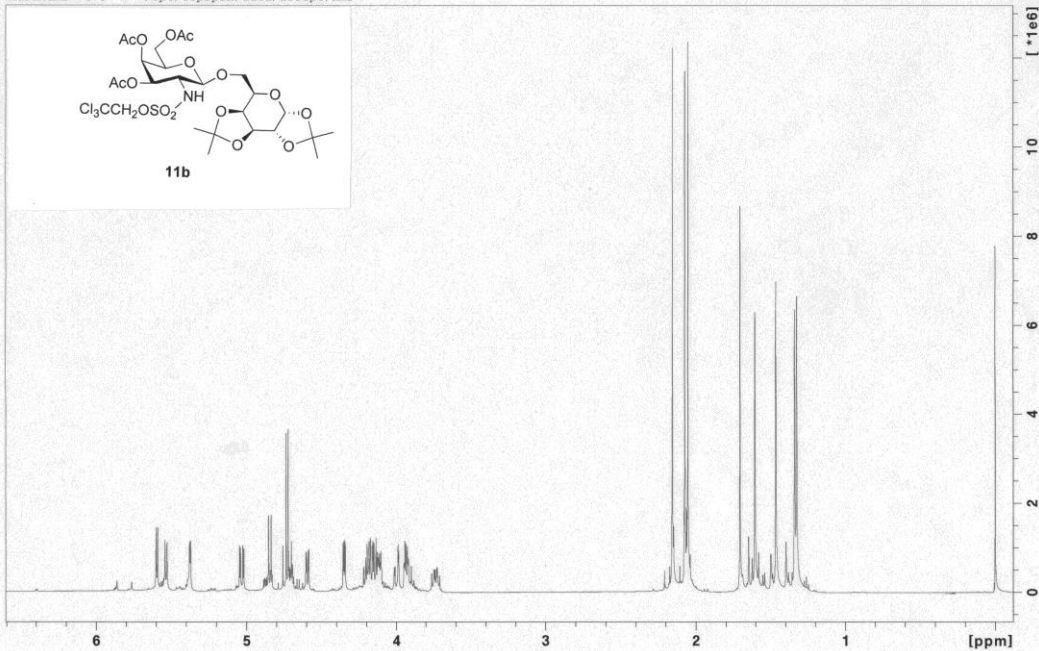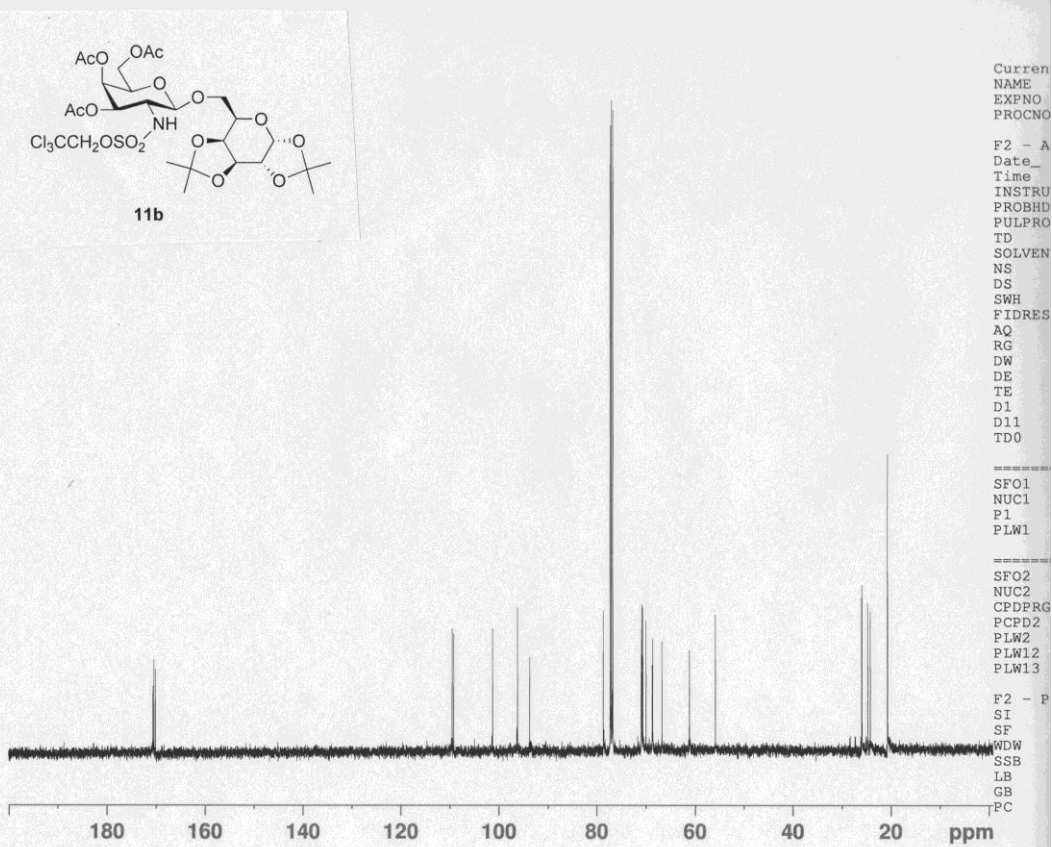

Murakami 293 1 /opt/topspin/data/accept/nmr

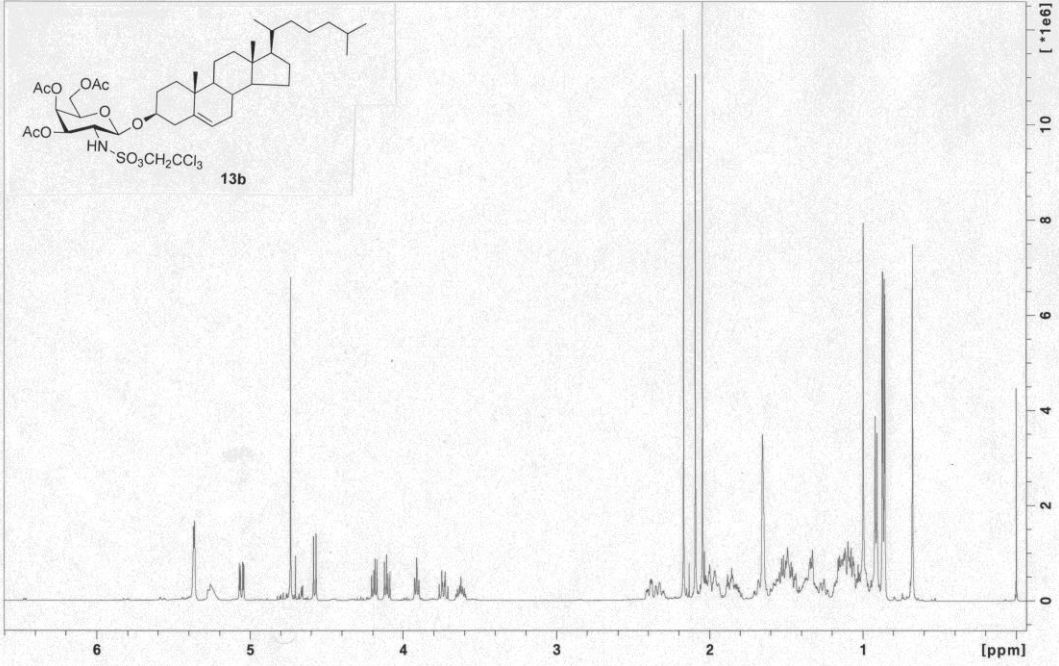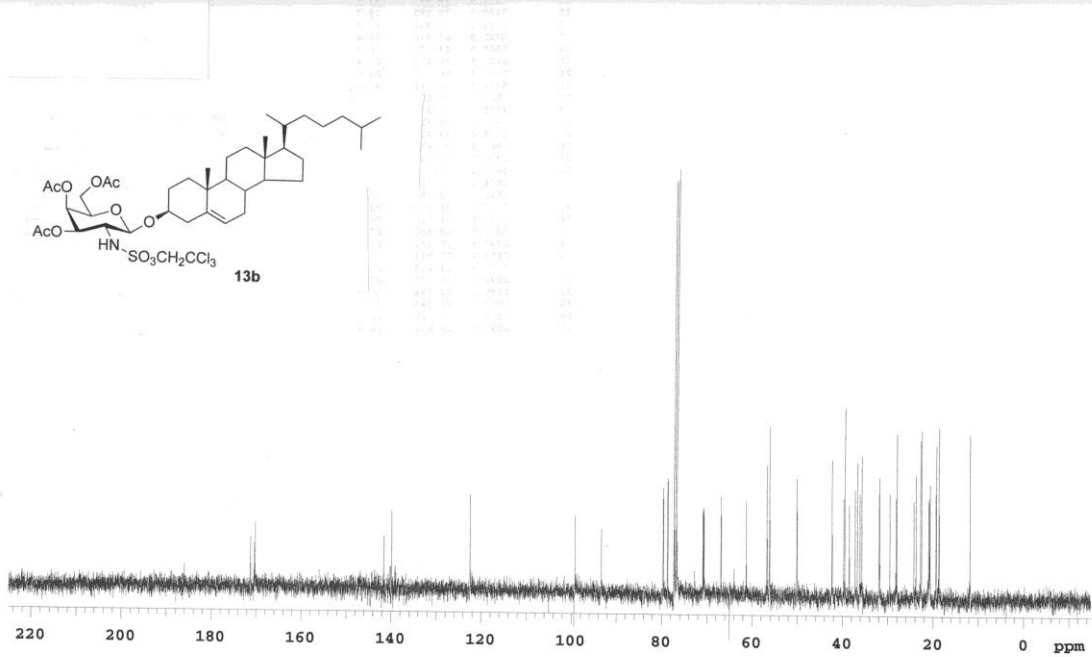



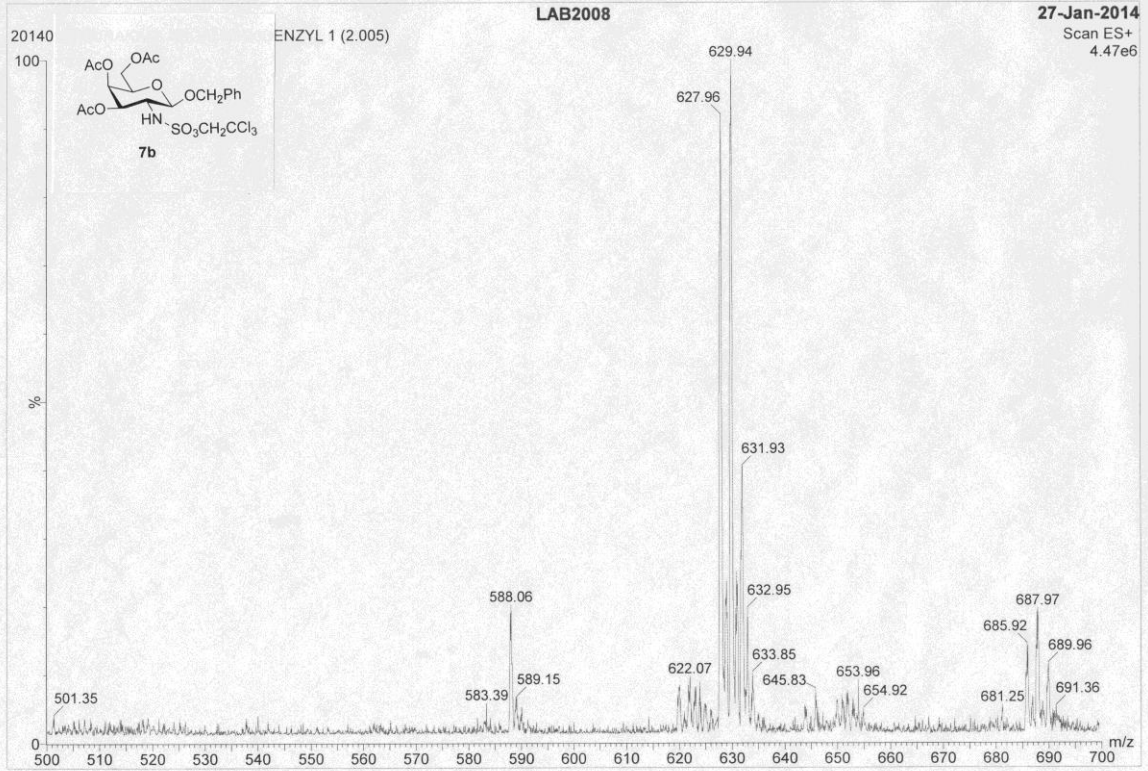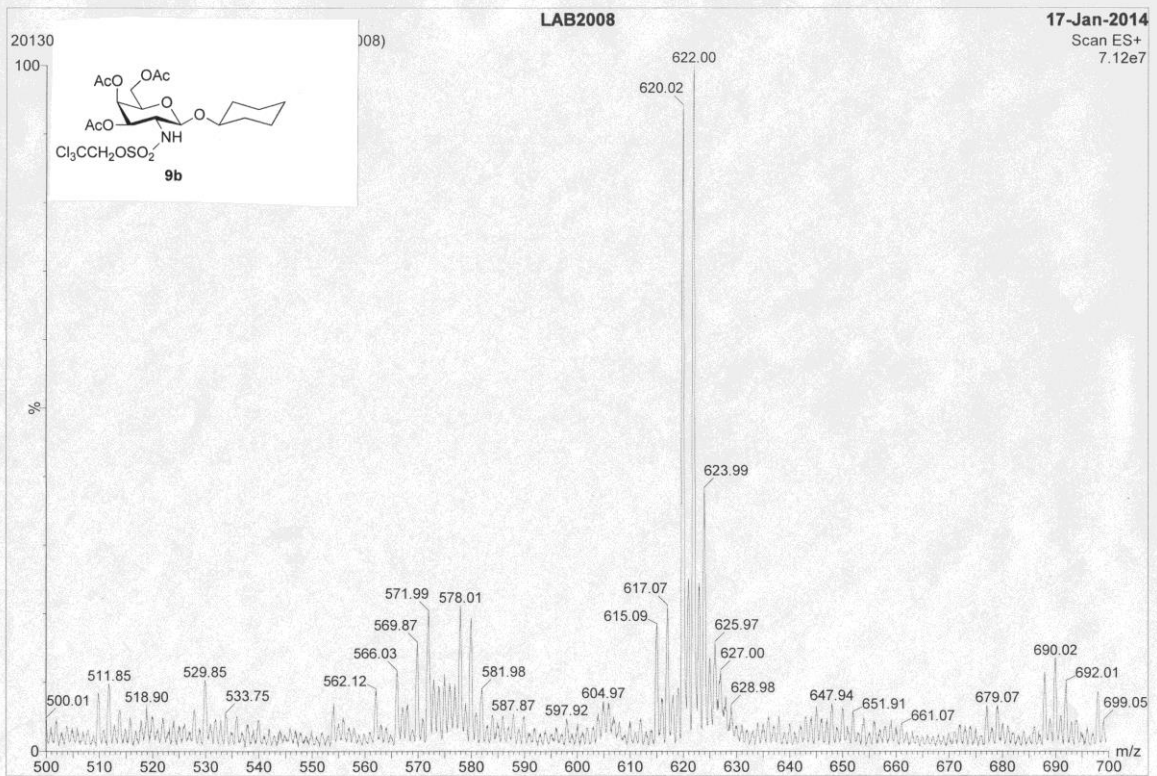

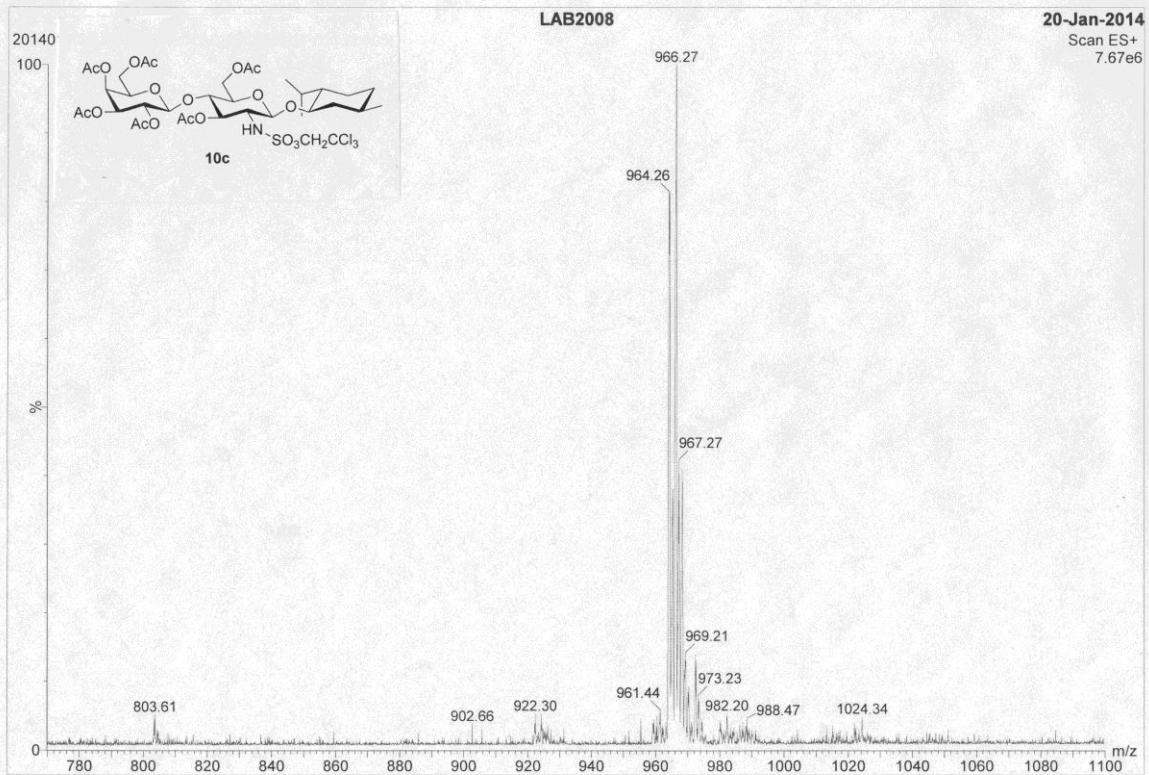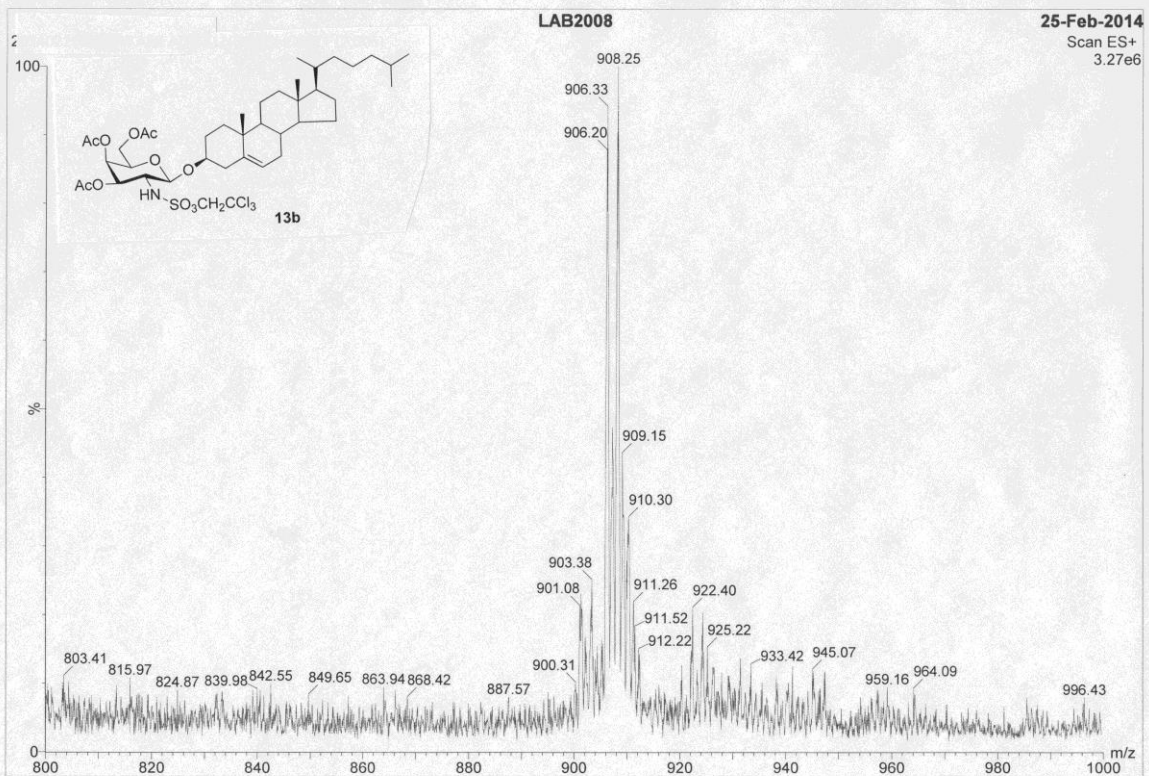

Supplement: c4ra02367f1.pdf [file c4ra02367f1.pdf]
